# Supplementary material
Source: PubMed Central journal article supplement (PMC4908195)
Supplement: mmc1.pdf [file mmc1.pdf]

**Supplemental Data**

**Mutations in the Histone Modifier**

***PRDM6* Are Associated with Isolated**

**Nonsyndromic Patent Ductus Arteriosus**

**Na Li, Lakshman Subrahmanyam, Emily Smith, Xiaoqing Yu, Samir Zaidi, Murim Choi, Shrikant Mane, Carol Nelson-Williams, Mohadesseh Bahjati, Mohammad Kazemi, Mohammad Hashemi, Mohsen Fathzadeh, Anand Narayanan, Likun Tian, Farhad Montazeri, Mitra Mani, Michael L. Begleiter, Brian G. Coon, Henry T. Lynch, Eric N. Olson, Hongyu Zhao, Jürgen Ruland, Richard P. Lifton, and Arya Mani**

### **Supplemental Note: Case Report**

The index case (III-2, fig.1A, arrow) was diagnosed with PDA at age 17 after she developed shortness of breath and peripheral edema during her first pregnancy. She delivered a healthy full-term child that was found to have a heart murmur and PDA. Further evaluation of the family at that time identified four additional family members with PDA. Individual II-2, who was known to have heart murmur, had fathered affected children by two different spouses, and 4 of his offspring were affected (fig. 1A). Two affected offspring also had children with PDA. In order to determine whether additional cases of PDA have occurred since the initial report, the kindred was reinvestigated and medical records of participating family members were reviewed. Individuals were classified as affected with PDA on the basis of cardiac catheterization or postmortem diagnosis of PDA. Eight individuals have undergone invasive procedures to close the patent ductus between the neonatal period and age 17. One neonate had died from congestive heart failure; with autopsy revealing a hypoplastic left ventricle, ventricular septum defect, mild pulmonary artery stenosis and a large and severely dilated PDA. There were no distinctive syndromic features noted in any of the affected subjects.

## Supplemental Figures

Figure S1

**A**

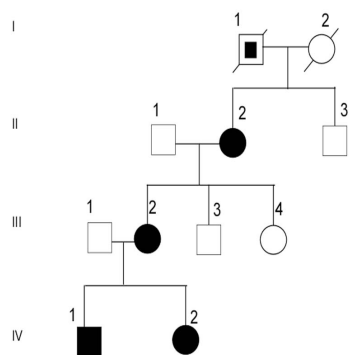

**B**

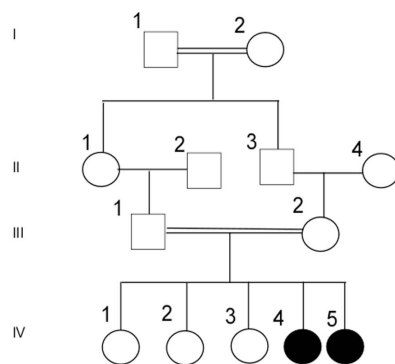

**C**

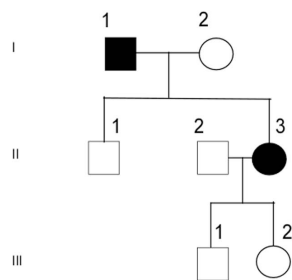

**D**

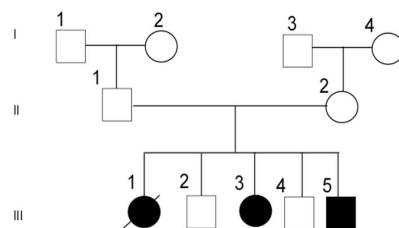

**E**

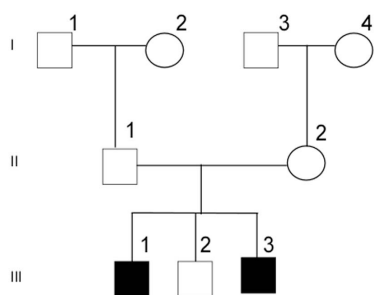

Figure S2

A)

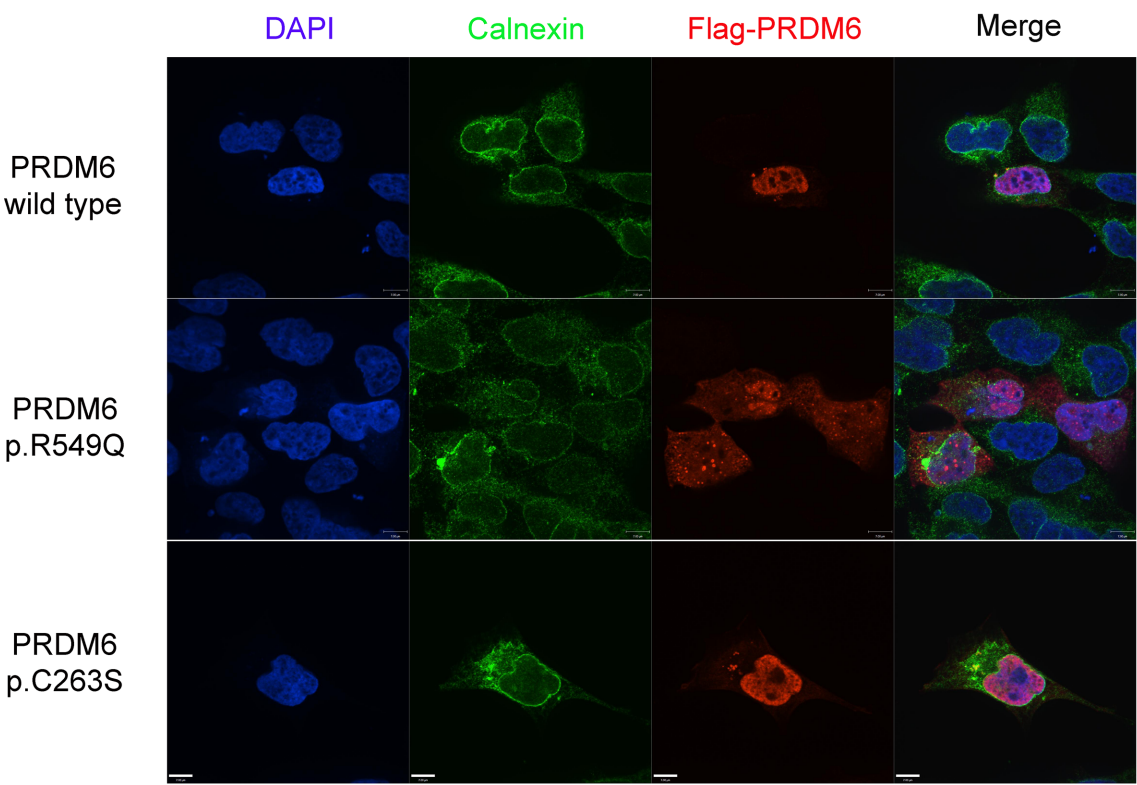

B)

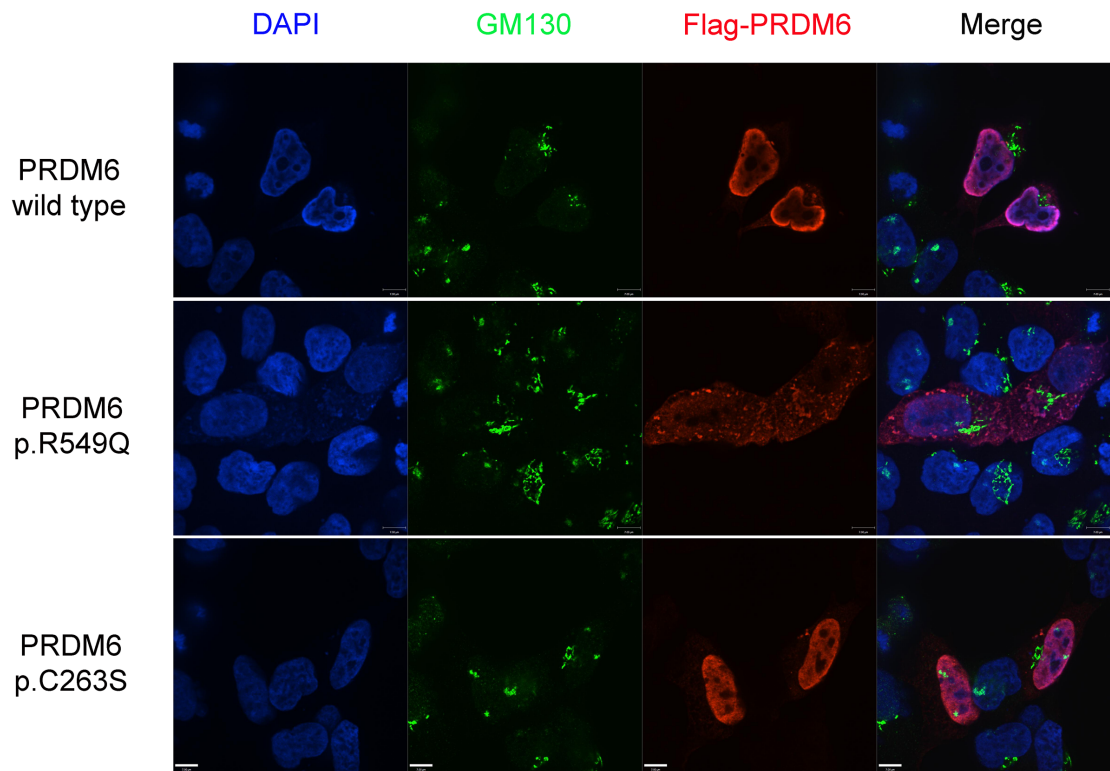

C)

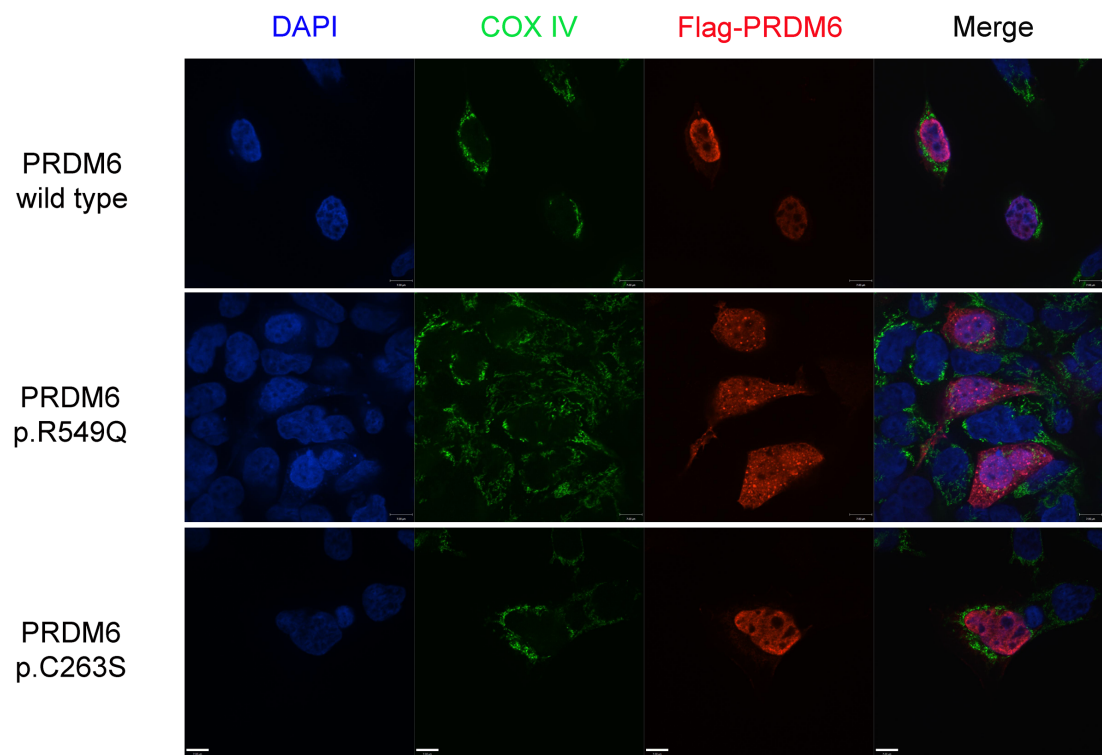

D)

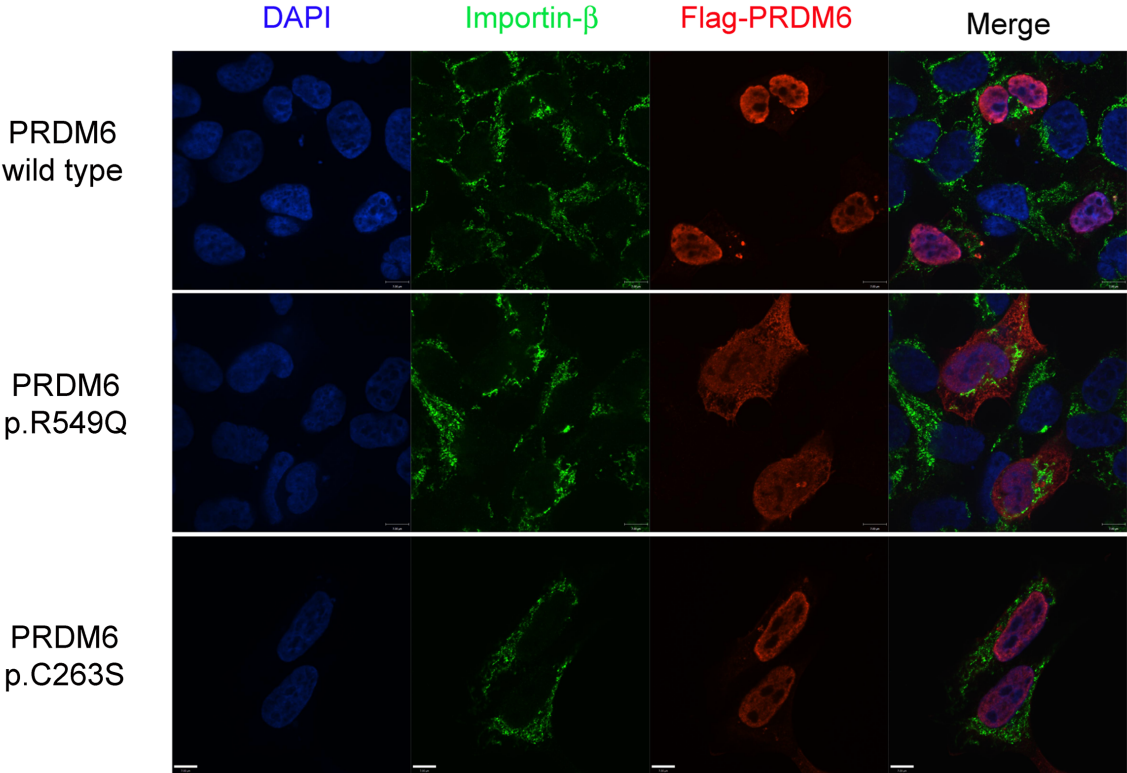

Figure S3

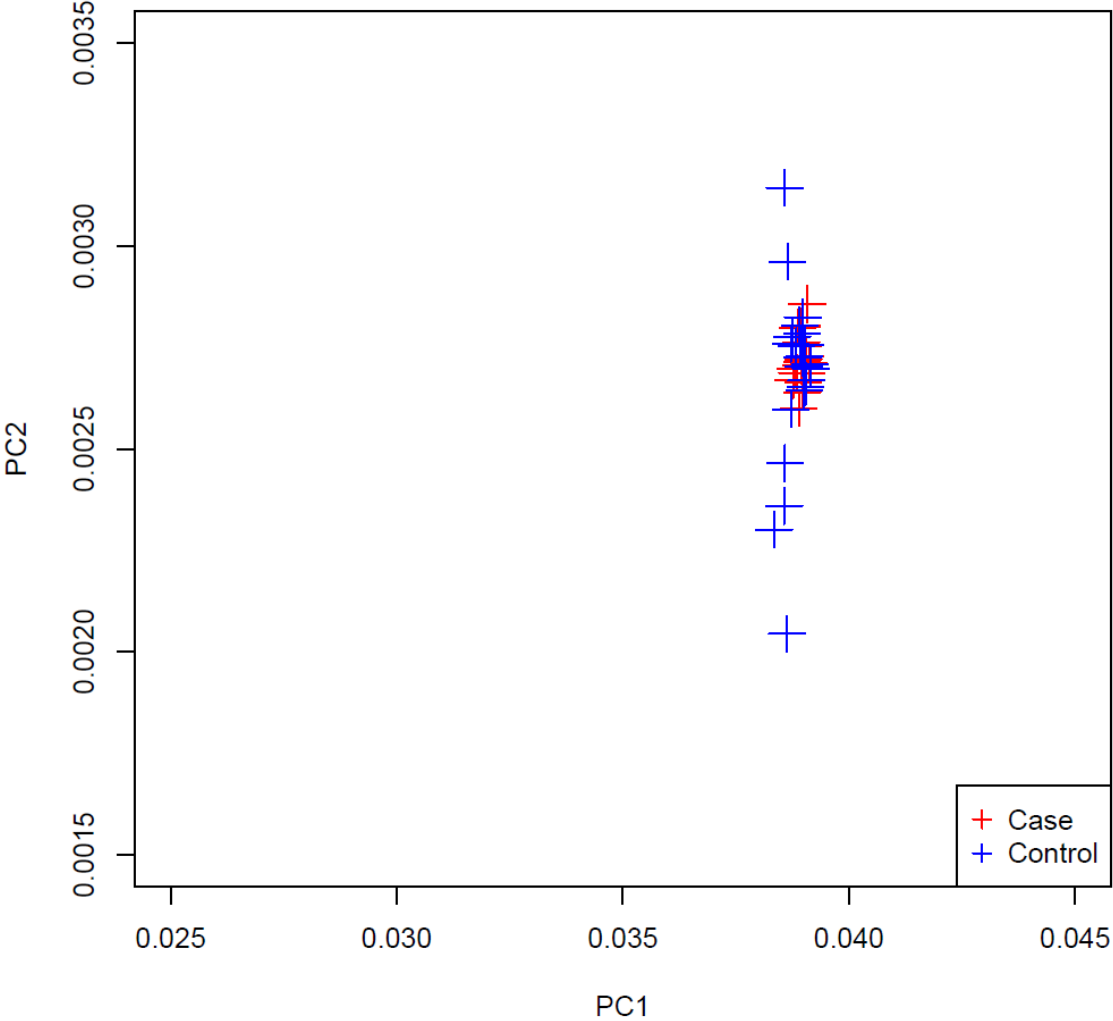

Figure S4

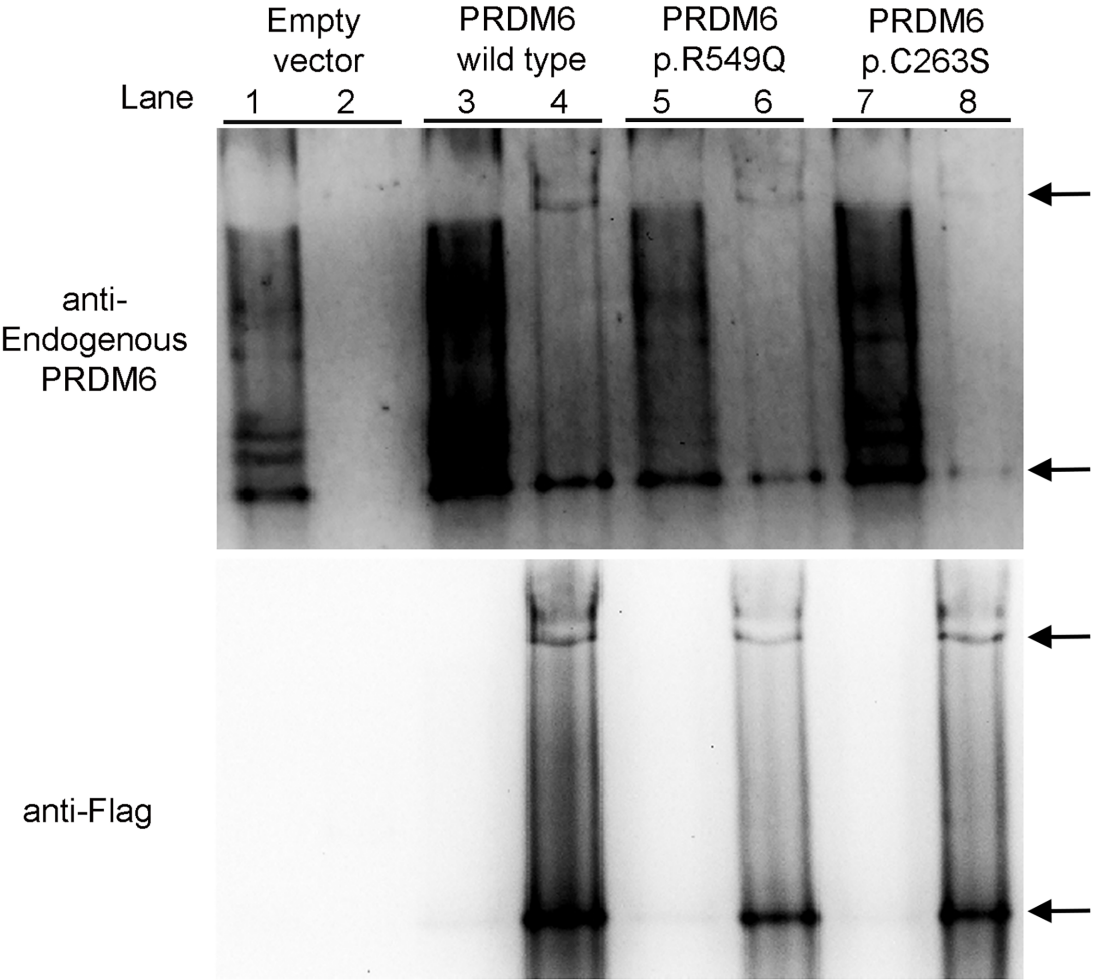

Figure S5

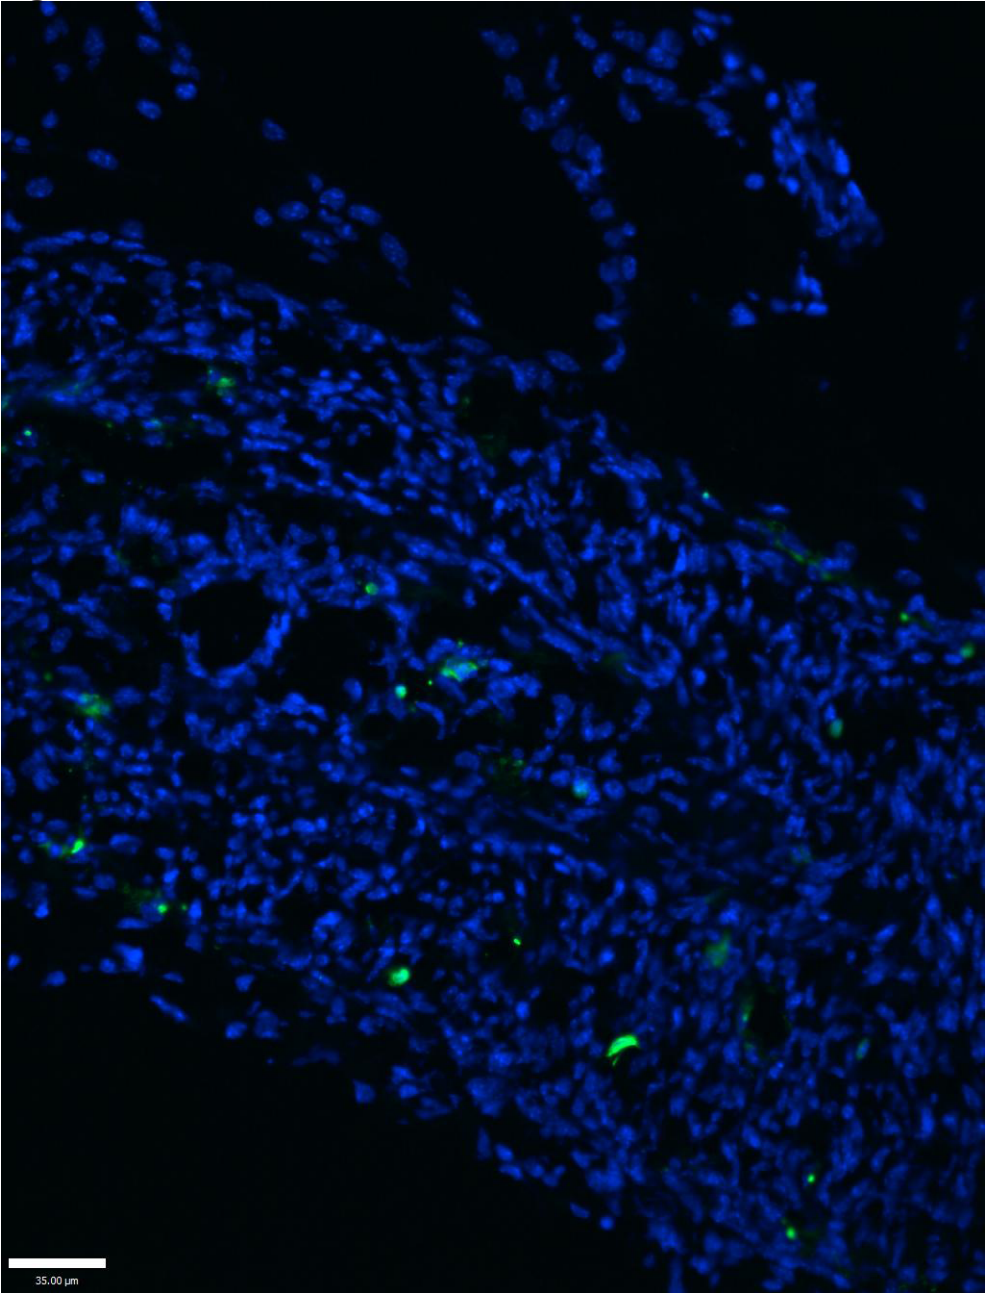

### Supplemental Figure Legends:

**Figure S1** – Representative pedigrees from other Caucasian families in our study. Individuals with PDA are indicated by black symbols; unaffected individuals are shown as unfilled symbols; individuals with unknown status have a dotted symbol. Circles represent females; squares represent males and symbols with a slash through them indicate deceased subjects.

**Figure S2** - Immuofluorescent pictures localizing wild type and two mutants *PRDM6* variants *PRDM6*<sub>Arg549Gln</sub> (p.R549Q) and *PRDM6*<sub>Cys263Ser</sub> (p.C263S) in relationship to the ER (calnexin) (A), Golgi apparatus (GM130) (B), mitochondria (COX IV) (C) and Importin- $\beta$  (D) in HEK293 cells. *PRDM6*<sub>R549Q</sub> retains largely in cytoplasm but not in Golgi or the ER.

**Figure S3** – The visualization of the principle component analysis (PCA) using the EIGENSTRAT program to compare SNP genotypes with MAF >5% between probands and 2000 North European controls. SNPs without evidence for significant linkage disequilibrium were used. The analysis excluded population stratification. Changing control population to the population from 1,000 Genomes did not change the result of analysis. A separate analysis was carried out using 2000 Northern European unaffected subjects sequenced in the same facility using the same WES protocol as a second control group (data not shown). Population stratification was excluded using this analysis, supporting consistent comparison between burden of variants in cases and controls.

**Figure S4** - *PRDM6* homodimerization. Human aortic VSMC were transduced with adenovirus (empty adenoviruses vectors or vectors containing Flag-tagged mouse *PRDM6* wild type, *PRDM6*<sub>p.R549Q</sub>, and *PRDM6*<sub>p.C263S</sub> constructs) and cultured for 48hr. Cells were washed twice with phosphate-buffered saline, scraped and lysed in 10mM Tris, pH7.4, 150mM NaCl, 1mM EDTA, 1% Triton X-100, and a cocktail of protease inhibitors. The supernatant was clarified by centrifugation at 20,000 g 4°C for 20min. Subsequently, lysates were immunoprecipitated with anti-Flag resin, washed three times in lysis

buffer at 4°C and bound protein was eluted with 0.1mg/ml 3X FLAG peptide (Sigma-Aldrich, St. Louis, MO) for 1hr at 4°C with gentle rotation before subjecting to native PAGE according to manufacture's instructions (Bio-rad). Monomeric endogenous PRDM6 and dimeric complexes were detected by immunoblotting with anti-human PRDM6. Monomeric exogenous PRDM6 and dimeric complexes were then detected by immunoblotting with anti-Flag antibody. Lanes 1, 3, 5, and 7 indicate the input controls. Lanes 2, 4, 6, and 8 indicates proteins after Flag-tag purification. The arrows indicate homodimers (the upper bands) and monomers (the lower bands).

**Figure S5** - Immunofluorescence staining showing apoptotic cells (green color) in DA at stage P0.5. Blue color represents DAPI staining of the nucleus. Scale bar represents 35um. Tissue Cryosections were air dried for 1hr, and subjected to fixation in 1% PFA. Then the sections were processed using ApopTag Plus Fluorescein In Situ Apoptosis Detection Kit (EMD Millipore) according to manufacture's instructions. Briefly, cryosections were post-fixed in precooled ethanol: acetic acid (2:1) for 5 min at -20°C, and washed in PBS twice. Equilibration buffer was applied on the specimen and incubated for 10 seconds at room temperature. Then the cryosections were incubated with TdT enzyme for 1hr at 37°C and the reaction was stopped by incubating with stop/wash buffer, and incubated with anti-digoxigenin conjugate for 30 min at room temperature avoid exposure to light. Finally, the cryosections were washed in PBS four times and mounted with ProLong Gold antifade reagent with DAPI (Life technologies)

Supplemental Tables

Table S1: Variants within the recombination interval on 5q23

| Position  | Gene or rs# | Mutation Type | Frequency for Exonic Variants<br>from EXAC |
|-----------|-------------|---------------|--------------------------------------------|
| 118500981 | rs11306851  | Intronic      | 0.09423                                    |
| 118639270 | rs1394631   | Intronic      |                                            |
| 120191189 | rs1422377   | Intronic      |                                            |
| 121488635 | ZNF474      | Exonic        |                                            |
| 122091535 | rs763497    | Intronic      |                                            |
| 122287705 | rs717503    | Intronic      |                                            |
| 122915059 | rs171546    | Intronic      | 0                                          |
| 122920306 | rs246266    | Intronic      |                                            |
| 122515990 | PRDM6       | Exonic        |                                            |
| 123736339 | rs51777     | Intronic      |                                            |
| 125246089 | rs719829    | Intronic      |                                            |
| 125929031 | ALDH7A1     | Intronic      |                                            |

Table S2: Pathways identified as significantly enriched for novel and deleterious genetic variants in 32 PDA samples

| GO Term                              | Background Frequency | Sample Frequency | P-Value* |
|--------------------------------------|----------------------|------------------|----------|
| Biological Process                   | 15968                | 226              | 9.17E-08 |
| Cellular Process                     | 13503                | 201              | 1.68E-06 |
| Histone Modification                 | 304                  | 17               | 9.14E-04 |
| Chromatin Modification               | 307                  | 7                | 1.00E-03 |
| Histone Lysine Methylation           | 57                   | 8                | 3.10E-03 |
| Multicellular Organismal Development | 4256                 | 81               | 7.35E-03 |
| Neuron Development                   | 793                  | 24               | 1.30E-01 |
| Axon Guidance                        | 404                  | 17               | 8.40E-01 |

\* P-Values are corrected for multiple comparisons

**Table S3: Histone Modification Genes Novel and Predicted to be deleterious by Polyphen and Sift (n=32)**

| Sample ID | Gene           | Mutation | Het/Hom | Pathway                                                                                                                              | PolyPhen/SIFT score |
|-----------|----------------|----------|---------|--------------------------------------------------------------------------------------------------------------------------------------|---------------------|
| 0115      | <i>GLI3</i>    | p.A909G  | Het     | Histone acetyltransferase binding, Histone deacetylase binding                                                                       | 0.991/0             |
| 77-3      | <i>HDAC11</i>  | p.R281Q  | Het     | Histone deacetylase complex, Histone deacetylase activity, Histone deacetylation                                                     | 1/?                 |
| 100       | <i>TET3</i>    | p.K344R  | Het     | Histone H3-K4 trimethylation*                                                                                                        | 0.996/0.13          |
| 105       | <i>RBM14</i>   | p.K149R  | Het     | Histone deacetylation                                                                                                                | 0.99/0.03           |
| 115       | <i>L3MBTL1</i> | p.C101F  | Het     | Nucleosomal histone binding, Methylated histone residue binding, Histone binding*                                                    | 0.999/0.01          |
| 119       | <i>ASH1L</i>   | p.R1646K | Het     | Histone-lysine N-methyltransferase activity*                                                                                         | 0.974/0.09          |
| 120       | <i>SETD1B</i>  | p.R882H  | Het     | Histone methyltransferase complex, Histone methyltransferase activity H3-K4 specific, Histone H3-K4 methylation*                     | 1/0                 |
| 124       | <i>HJURP</i>   | p.N306K  | Het     | Histone binding                                                                                                                      | 0.985/0             |
|           | <i>L3MBTL2</i> | p.S46C   | Het     | Methylated histone residue binding, Histone binding*                                                                                 | 0.999/0.01          |
| 125       | <i>BAP1</i>    | p.C103Y  | Het     | Monoubiquitinated histone H2A deubiquination                                                                                         | 0.999/0.04          |
| 135       | <i>KMT2A</i>   | p.R4597C | Het     | Histone-lysine N-methyltransferase activity*                                                                                         | 1/0.08              |
| 138       | <i>PPAGC1A</i> | p.R282C  | Het     | Positive regulation of histone acetylation                                                                                           | 0.999/0             |
| 171       | <i>NASP</i>    | p.G407R  | Het     | Histone exchange                                                                                                                     | 1/0                 |
|           | <i>PRDM2</i>   | p.K946R  | Het     | Histone-lysine N-methyltransferase activity*                                                                                         | 1/0.01              |
| 256-3     | <i>TUT1</i>    | p.R623W  | Het     | Histone mRNA catabolic process                                                                                                       | 1/0.05              |
| 263       | <i>SP1</i>     | p.T265P  | Het     | Histone acetyltransferase binding, Histone deacetylase binding                                                                       | 0.992/0.05          |
| 327-3     | <i>TRRAP</i>   | p.N28301 | Het     | Histone acetylation, Histone deubiquination, NuA4 histone acetyltransferase complex, Histone H4 acetylation, Histone H2A acetylation | 0.993/0             |
