# Supplementary material
Source: PubMed Central journal article supplement (PMC4908195)
Supplement: mmc2.pdf [file mmc2.pdf]

# Mutations in the Histone Modifier *PRDM6* Are Associated with Isolated Nonsyndromic Patent Ductus Arteriosus

Na Li,<sup>1,9</sup> Lakshman Subrahmanyam,<sup>1,9</sup> Emily Smith,<sup>1,9</sup> Xiaoqing Yu,<sup>2</sup> Samir Zaidi,<sup>2</sup> Murim Choi,<sup>2</sup> Shrikant Mane,<sup>2</sup> Carol Nelson-Williams,<sup>2</sup> Mohadesseh Bahjati,<sup>3</sup> Mohammad Kazemi,<sup>4</sup> Mohammad Hashemi,<sup>4</sup> Mohsen Fathzadeh,<sup>1</sup> Anand Narayanan,<sup>1</sup> Likun Tian,<sup>1</sup> Farhad Montazeri,<sup>1</sup> Mitra Mani,<sup>1</sup> Michael L. Begleiter,<sup>5</sup> Brian G. Coon,<sup>1</sup> Henry T. Lynch,<sup>6</sup> Eric N. Olson,<sup>7</sup> Hongyu Zhao,<sup>2</sup> Jürgen Ruland,<sup>8</sup> Richard P. Lifton,<sup>1,2</sup> and Arya Mani<sup>1,2,\*</sup>

Nonsyndromic patent ductus arteriosus (PDA) is a common congenital heart defect (CHD) with both inherited and acquired causes, but the disease mechanisms have remained elusive. Using combined genome-wide linkage analysis and whole-exome sequencing (WES), we identified independent mutations in *PRDM6*, which encodes a nuclear protein that is specific to vascular smooth muscle cells (VSMC), has histone methyl transferase activities, and acts as a transcriptional suppressor of contractile proteins. In vitro assays showed that the mutations cause loss of function either by intracellular redistribution of the protein and/or by alteration of its methyltransferase activities. Wild-type embryonic ductus arteriosus (DA) exhibited high levels of *PRDM6*, which rapidly declined postnatally as the number of VSMCs necessary for ductus contraction increased. This dynamic change suggests that *PRDM6* plays a key role in maintaining VSMCs in an undifferentiated stage in order to promote their proliferation and that its loss of activity results in premature differentiation and impaired remodeling of the DA. Our findings identify *PRDM6* mutations as underlying genetic causes of nonsyndromic isolated PDA in humans and implicates the wild-type protein in epigenetic regulation of ductus remodeling.

## Introduction

Patent ductus arteriosus (PDA [MIM: 607411]) is the second most common congenital heart defect (CHD) and affects up to 5,000 live births in the United States.<sup>1,2</sup> During fetal life, the ductus arteriosus (DA) shunts blood from the pulmonary artery to the aorta, bypassing the lungs. Its abrupt closure at birth, which establishes the mature circulatory pattern, is the result of a protracted and dramatic process of vascular remodeling. According to results from animal studies, the remodeling of the DA is a complex process involving the migration of neural-crest-derived cells into the subendothelial space and their transformation to vascular smooth muscle cells (VSMCs), as well as extracellular-matrix accumulation and formation of subintimal cushions. Subsequently, an increase in vasoactive peptides such as endothelin A1, a decrease in prostaglandin E2 levels,<sup>3,4</sup> and ultimately VSMC contraction result in closure of the vessel.<sup>5,6</sup> Experimental in vivo and in vitro studies have shown that failure in any step of this process can result in persistent patency of the DA and thus lead to pulmonary arterial hypertension, pulmonary edema, and congestive heart failure in humans.<sup>7</sup>

The molecular mechanisms underlying DA remodeling in humans are not understood. The disease can be ac-

quired, and congenital rubella syndrome is the best-known cause.<sup>8</sup> The increased familial recurrence, the autosomal-dominant inheritance of rare syndromic and nonsyndromic PDA, and the development of the trait in transgenic mice are strong pieces of evidence supporting the sizable role of genetics in the development of this condition. These studies have implicated the central role of neural-crest-derived VSMCs and genes regulating their function in remodeling of the DA.<sup>9,10</sup> Genetic determinants of nonsyndromic PDA in humans are not known. We ascertained 35 individuals affected by nonsyndromic familial PDA and extended their kindreds. Except for a large African-American kindred with sufficient power for linkage, all other affected individuals were white subjects from nuclear kindreds (Figure S1). All were products of healthy full-term pregnancies; maternal rubella had been excluded. They all had undergone cardiac catheterization at the time of recruitment and had no other vascular anomalies. All but one were living subjects, and all had undergone surgical or transvenous device closure for isolated PDA. Combined genome-wide linkage analysis, whole-exome sequencing (WES), and gene-set enrichment analysis (GSEA) were performed for the identification of disease-associated mutations.

<sup>1</sup>Cardiovascular Research Center, Department of Internal Medicine, Yale University School of Medicine and Howard Hughes Medical Institute, New Haven, CT 06520, USA; <sup>2</sup>Department of Genetics, Yale University School of Medicine, New Haven, CT 06520, USA; <sup>3</sup>Isfahan Cardiovascular Research Center, Cardiovascular Research Institute, Isfahan University of Medical Sciences, Isfahan 81746, Iran; <sup>4</sup>Isfahan University of Medical Sciences, Isfahan 81746, Iran; <sup>5</sup>School of Medicine, University of Missouri – Kansas City, Kansas City, MO 64108, USA; <sup>6</sup>Department of Preventative Medicine, School of Medicine, Creighton University, Omaha, NE 68131, USA; <sup>7</sup>Department of Molecular Biology, University of Texas Southwestern Medical Center, Dallas, TX 75390, USA; <sup>8</sup>Institute für Klinische Chemie und Pathobiochemie, Klinikum Rechts der Isar, Technische Universität München, Munich 81675, Germany

<sup>9</sup>These authors contributed equally to this work

\*Correspondence: [arya.mani@yale.edu](mailto:arya.mani@yale.edu)

<http://dx.doi.org/10.1016/j.ajhg.2016.03.022>

© 2016 American Society of Human Genetics.

## Material and Methods

### Ascertainment and Recruitment of PDA Subjects

The study protocol was approved by the Human Investigation Committee of the Yale University School of Medicine, the institutional review boards at the University of Nebraska and University of Kansas, and the Committee for Ethics and Research Conduction at the Isfahan Cardiovascular Research Center. Consent was obtained from all subjects. Records were reviewed for documentation of diagnosis, age of diagnosis, clinical findings, treatment, and family history. Subjects underwent physical examinations, and venous blood samples were collected. Blood samples were processed locally by either traditional phenol-chloroform extraction or salt extraction.

### Analysis of Linkage

Genome-wide analysis of linkage was performed with the Affymetrix GeneChip 10K Array. Additional markers were typed in selected intervals for maximizing informativeness for the linked interval. These markers were genotyped by PCR with specific fluorescently labeled oligonucleotide primers and genomic DNA as a template. The resulting amplified products were fractionated by electrophoresis on denaturing polyacrylamide gels with an ABI3700 instrument and analyzed with GeneScan 2.1 and Genotyper 1.1.1 software. Two independent investigators scored all genotypes. Analysis of linkage was performed with GeneHunter 2.1. For allele frequencies, mean frequencies of 300 ethnically matched control individuals were used.

### Targeted Sequence Capture

Genomic DNA was captured on exomes at the W.M. Keck Facility at Yale University as described earlier.<sup>2</sup> The Roche NimbleGen 2.1M Human Exome Array covers 34.0 Mb of genomic sequence and approximately 180,000 exons of 18,673 protein-coding genes. In brief, DNA was fragmented and ligated to linkers and then fractionated by agarose gel electrophoresis. Extracted DNA was amplified by PCR and hybridized to the capture arrays. Bound genomic DNA was eluted, purified, and amplified by ligation-mediated PCR. The PCR products were purified and subjected to DNA sequencing on the Illumina platform.

### Sequencing

Captured libraries were sequenced on the Illumina Genome Analyzer, and then image analysis and base calling were performed. Sequence reads were mapped to the human reference genome (UCSC Genome Browser hg19) with the MAQ program SAMtools. Resulting sequence data were processed with MAQ software. SAMtools was used to detect single-nucleotide variants, which were subsequently filtered against the reference genome as described earlier.<sup>11</sup> Filters were applied against published databases. A Perl-based computer script was used for annotating variants according to their effect on the protein, novelty, conservation, and tissue expression. Variants were considered non-conservative if the substituted amino acid was conserved in all species or had a maximum of one conserved substitution. Sanger sequencing was carried out for most variants of interest, including all variants in *PRDM6* (PR domain 6). Gene Ontology (GO) was used for GSEA. Variants were filtered if they had allele frequencies greater than 0.01% in the Exome Aggregation Consortium (ExAC) Browser and if they were considered not damaging by PolyPhen and SIFT software. Mutations in genes

with expression levels 2 SDs below average in the heart, cardiomyocytes, smooth muscle cells, and aorta were excluded from analysis. The expression level from each tissue was based on Affymetrix GNF\_U133A (as were expression data from the UCSC Genome Browser). The 1000 Genomes Project and an exome database of 2,000 healthy white subjects were used as controls. Population structure was excluded by principal-component analysis (Figure S3).

### Mutagenesis and Adenoviral Constructs

pcDNA3.1 plasmid containing mouse wild-type *Prdm6* with FLAG tag was kindly provided by Dr. Eric Olson. PRDM6 amino acid substitutions p.Arg549Gln (c.1646G>A) and p.Cys263Ser (c.788G>C) were generated with the QuikChange II Site-Directed Mutagenesis Kit (Agilent Technologies) according to the manufacturer's instructions. Adenovirus expression plasmid pAd/CMV/V5-DEST (Invitrogen, Life Technologies) separately encoding FLAG-PRDM6-WT, FLAG-PRDM6-p.Arg549Gln, and FLAG-PRDM6-p.Cys263Ser was prepared with Gateway Cloning technology (Life Technologies) according to the manufacturer's instructions.

### Antibodies

Antibodies to  $\alpha$ -smooth muscle actin ( $\alpha$ -SMA), myosin heavy chain 11 (MYH11), CD31, GM130, importin- $\beta$ , and H3 pan were purchased from Abcam. Antibodies to phalloidin and GAPDH were purchased from Cell Signaling Technology. Antibodies to H4K20me2, H3K9me2, and H4 pan were purchased from EMD Millipore. Antibodies to PRDM6, FLAG, and Calnexin were purchased from Novus Biologicals, Sigma-Aldrich, and Enzo Life Sciences, respectively.

### Immunofluorescence Staining

Wild-type mouse DAs were micro-dissected and embedded in optimal cutting temperature (OCT) compound at three different developmental stages: embryonic days 14.5 (E14.5) and 17.5 (E17.5) and postnatal day 0.5 (P0.5).<sup>12</sup> The differences in fluorescence intensities were compared with MATLAB software.

Cells were seeded in a glass-bottom petri dish. HEK293 cells were transfected with Lipofectamine 2000, and human aortic VSMCs were infected with adenovirus. 48 hr later, cells were fixed in 4% paraformaldehyde and were permeabilized in 0.1% Triton X-100 and blocked with 3% BSA in PBS after appropriate washes. Specimens were subsequently incubated with primary antibodies followed by fluorescence-conjugated secondary antibodies at room temperature and were mounted with ProLong Gold Antifade Mountant with DAPI (Invitrogen). Images were acquired with a Zeiss LSM510 confocal microscope.

### Immunoblotting

Human aortic VSMCs (passage 3) transfected with adenovirus were lysed with cell-lysis buffer (Cell Signaling Technology) for extraction of total protein or with the EpiQuik Total Histone Extraction Kit (EpiGentek) for obtaining histone protein according to the manufacturers' instructions. Lysates were processed and applied to SDS-PAGE and further immunoblotted with target primary antibodies followed by appropriate horseradish-peroxidase-conjugated secondary antibodies. Enhanced chemiluminescence reagents were applied for blot development. ImageJ software was used for quantification of the band intensities.

## GSEA

GSEA is a systematic analysis frequently used for identifying disease-causing mutations for complex traits.<sup>13–15</sup> For this analysis, we assigned to GO pathways all non-conservative deleterious variants with allele frequencies less than 0.01% (<1:10,000) in the ExAC Browser. After exclusion of population stratification, 2,000 exomes of European descent were used as controls. Subsequently, we used Fisher's exact test to compare the ratio of identified variants and total number of bases sampled in a given pathway to the same ratio obtained from the control population. *p* values for these comparisons were corrected for multiple comparisons as previously described, and  $p < 2.7 \times 10^{-4}$  was considered significant. The estimated odds ratio of these variants for the trait was calculated. We rejected the null hypothesis that these pathways could be over-represented in a small sample by chance by applying a randomization test of exome variants of 32 randomly selected individuals from the control exome database with a *p* value of  $4 \times 10^{-51}$ .

## Statistical Analysis

All in vitro experiments were carried out in triplicate. Data are expressed as means  $\pm$  SEM. Comparisons between two groups were performed with Fisher's exact test. Statistical significance is defined as  $p < 0.05$ . The expected number of genes with more than one previously unreported non-conservative and deleterious mutation was determined by Monte Carlo simulation ( $10^4$  iterations) specifying the total number of nonsynonymous and deleterious mutations and 21,000 genes of observed coding length.

## Results

### Linkage Analysis Maps the Disease-Associated Mutation to 5q23 in a Large PDA-Affected Kindred

Kindred PDA-101 (Figure 1A) is a large African-American family, first reported in 1965.<sup>16</sup> To our knowledge, this is the largest reported nonsyndromic-PDA-affected kindred with sufficient power for linkage (see Supplemental Note). In sum, a total of nine individuals with PDA were identified in the family; all had a definitive diagnosis of PDA, were born at term as the product of normal gestation, and could trace their ancestry to a single pair of founders. We found no subjects with PDA or other CHD anomalies in other branches of the kindred, arguing against multifactorial determination (complex trait). These findings strongly supported autosomal-dominant transmission of PDA with incomplete penetrance, thereby prompting further genetic study.

In order to map the disease-associated mutation in PDA-101, we performed genome-wide SNP genotyping in all family members by using the Affymetrix GeneChip 10K Array according to the manufacturer's protocol. We used two pre-specified models of the trait locus to compare the inheritance of marker alleles to the inheritance of PDA: (1) a conservative model specified the trait locus as autosomal dominant with 90% penetrance, a phenocopy rate of 1%, and a disease allele frequency of 0.001, and (2) a stringent model specified 99% penetrance, 0.1% phenocopies, and an allele frequency of 0.0001. Pairwise analysis

of linkage demonstrated positive LOD scores for linkage to a cluster of markers in chromosomal region 5q23. The maximum pairwise LOD score was 2.57 (at a recombination fraction [ $\theta$ ] of 0 with the marker rs2081914). Multi-point analysis confirmed linkage to this chromosomal segment, yielding a maximum LOD score of 3.12 for linkage of the trait locus (Figure 1B), *PDA1*, to rs2081914 at  $\theta = 0$ . No other interval in the genome yielded a LOD score greater than 1.0, providing strong evidence that *PDA1* lies in the 5q23 interval. Changing estimates of penetrance of the trait locus from 80% to 95% and the frequency of mutant genes did not have substantial effects on the LOD score or the disease locus (data not shown). Linkage analysis of only affected individuals yielded similar results, such that no other genomic interval was shared among all studied subjects. Review of the segregating haplotypes demonstrated that all affected individuals share a haplotype in this interval (Figure 1A). These findings indicate significant linkage of PDA to 5q23 in this kindred.

### A Missense Mutation in *PRDM6* Underlies Autosomal-Dominant PDA

The LOD-1 support interval, which approximates the 95% confidence interval for the disease locus, spans a 10 cM (10 Mb) interval flanked by loci rs721065 and rs2108652 and contains 42 annotated genes. Four remotely related members of this kindred (subjects III-2, IV-9, III-11, and IV-6; Figure 1A) were screened for mutations by WES on the Roche NimbleGen 2.1M Human Exome Array. We achieved 95% coverage of the reference genome at a minimum depth of 20 reads. After quality filtering, we found a mean of 18,000 exomic variations per individual. We used SAMtools and the Genome Analysis Toolkit to detect polymorphic sites. The remainder (an average of 400 variants) were filtered against 1000 Genomes, the National Heart, Lung, and Blood Institute (NHLBI) Exome Sequencing Project (ESP) Exome Variant Server (ESP6500, including 2,300 African Americans), the ExAC Browser, and the Yale 5,000 exome database (including 2,000 healthy control individuals). These variants were further filtered by conservation as follows. If the identified amino acid change was seen in 0 or 1 of 44 vertebrate species, the change was considered non-conservative. After this filtering, there remained only one single non-conservative *PRDM6* variant (c.1646G>A [p.Arg549Gln] [GenBank: NM\_001136239.1]) that tightly linked to the location of the maximum LOD score within the shared haplotype and perfectly segregated with the disease (Figure 1C). Other mutations in the recombination interval were either intronic or common polymorphisms (Table S1). Arg549 resides in the protein's fourth zinc-finger domain, which is critical for nuclear localization of the protein and is highly conserved in orthologs from humans to sea anemones (Figure 1D). The mutation was present in all other affected individuals, was absent in all unaffected family members and all exome databases (including the ExAC

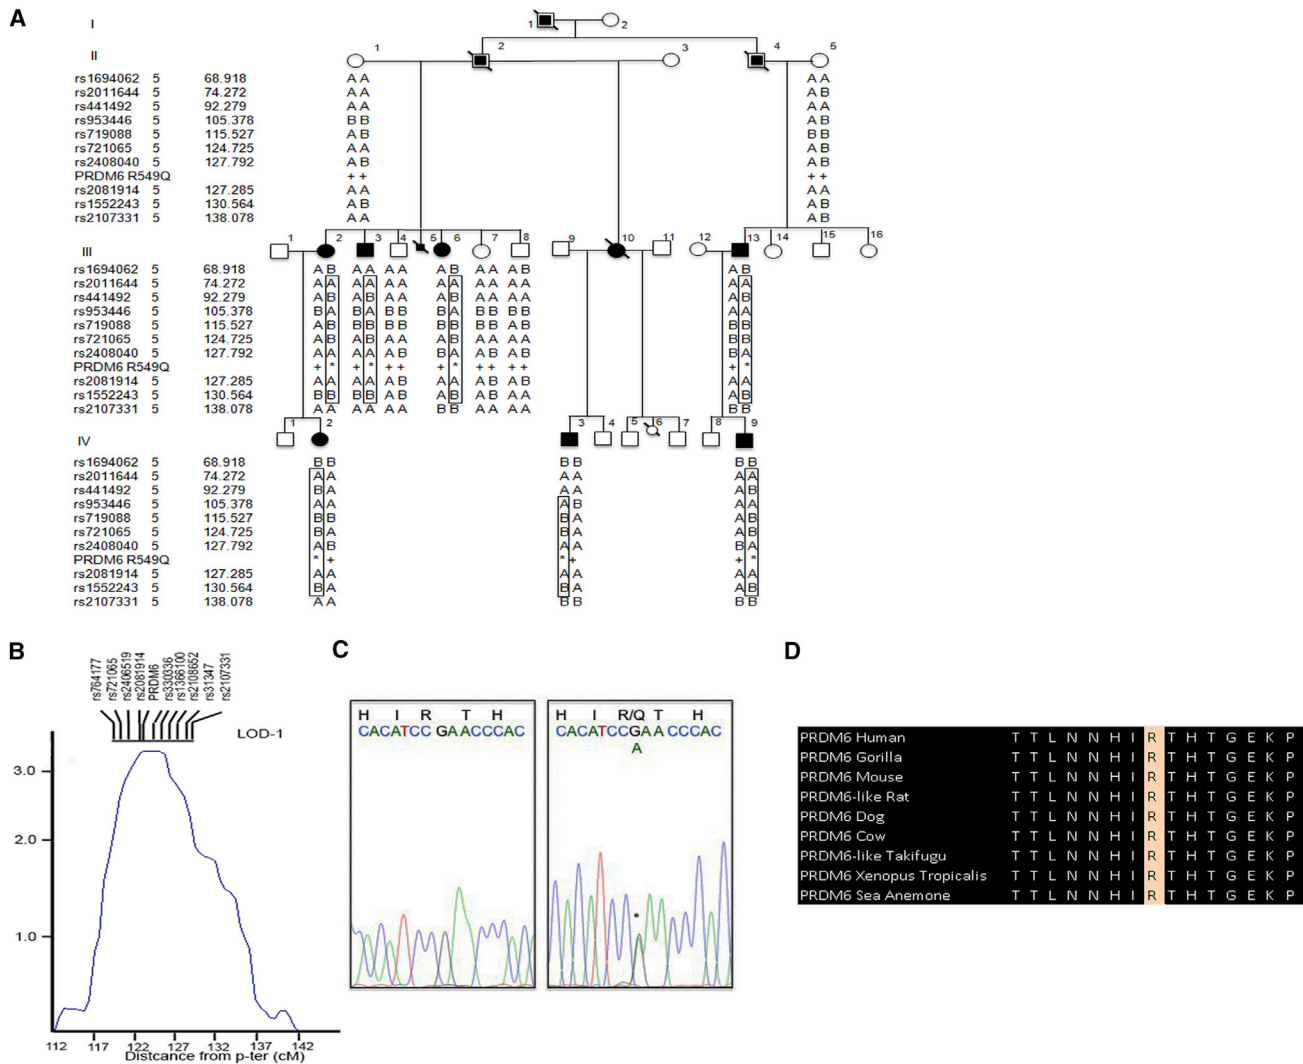

**Figure 1. PRDM6 p.Arg549Gln in a Large PDA-Affected Kindred**

(A) Pedigree PDA-101 is shown. Individuals with PDA are indicated by black symbols, individuals without PDA are shown as unfilled symbols, and individuals with unknown PDA status are shown with partially filled squares. Circles represent females, squares represent males, and symbols with a slash through them indicate deceased subjects. Haplotypes on 5q23 are shown under each individual.

(B) Multipoint LOD scores for linkage of PDA to 5q23. SNPs tightly linked to the location of *PRDM6* in the LOD-1 region are shown. The maximum LOD score is indicated, and the location of *PRDM6* is shown. The LOD score peak occurs at  $\theta = 0$  with marker rs2081914, and the LOD-1 interval spans 10 cM.

(C) The DNA sequence of a segment flanking c.1646G>A in *PRDM6* is shown from an unaffected kindred member (left) and a heterozygous mutation carrier (right). This single-base substitution (asterisk) changes the wild-type arginine to glutamine at amino acid 549 (p.Arg549Gln).

(D) A portion of the *PRDM6* amino acid sequence flanking Arg549 is shown from diverse vertebrate species.

Browser), and was predicted to be deleterious by PolyPhen and SIFT.

Examination of the exome data in the remaining PDA-affected individuals ( $n = 34$ ) led to the identification of two additional non-conservative mutations in *PRDM6* (c.788G>C [p.Cys263Ser] and c.1385A>G [p.Gln462Arg]) in two unrelated subjects (Figures 2A and 2B). Amino acid substitution p.Gln462Arg was also present in the affected daughter of the subject. No segregation analysis could be carried out in the kindred affected by p.Cys263Ser, because the affected mother and maternal grandfather of the index subject had died before sample

collection. Statistical analysis using two random control subjects from the NHLBI Exome Variant Server showed that recurrent mutations in this gene in this number of samples is unlikely to have occurred by chance ( $p < 4.74 \times 10^{-6}$ , Monte Carlo simulation). It is noteworthy that no single nonsynonymous mutation in *PRDM6* was identified in exomes of our 2,000 healthy white control individuals. Amino acid substitutions p.Cys263Ser and p.Gln462Arg were also absent in all other public exome databases (including the ExAC Browser) and were predicted to be deleterious by PolyPhen and SIFT. Cysteine at codon 263 and glutamine at codon 462 are

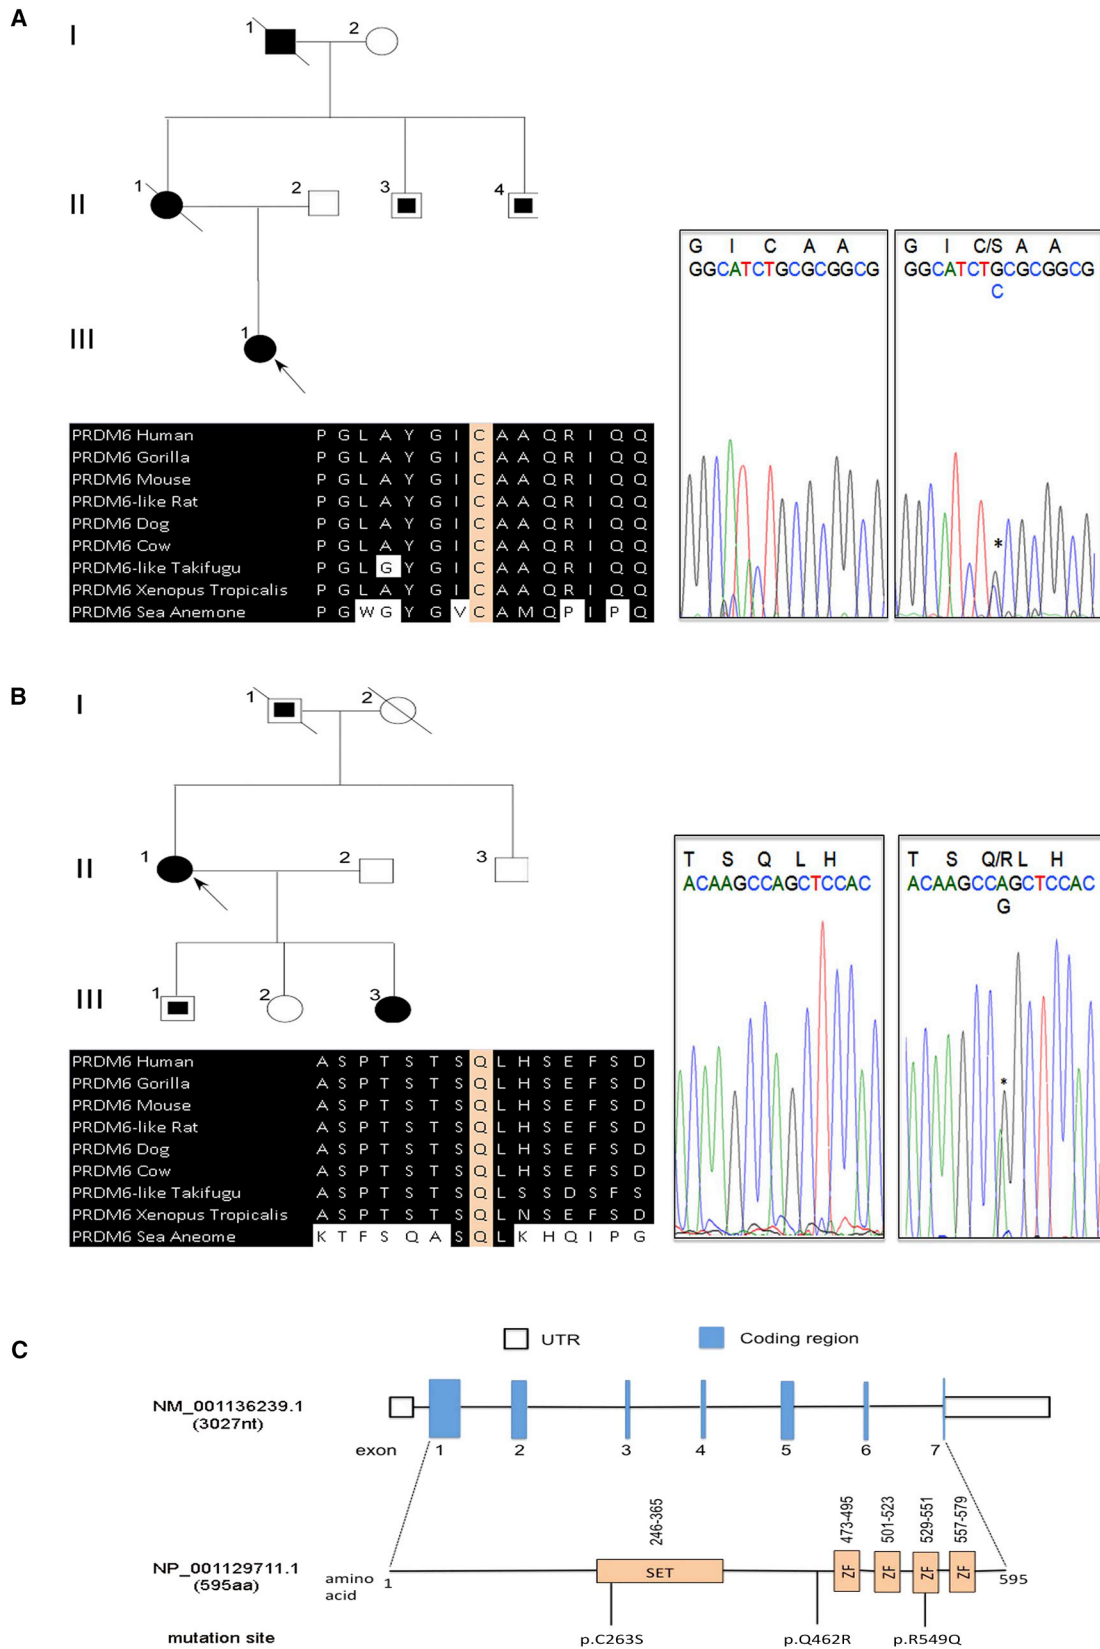

**Figure 2. Independent Non-conservative Mutations of *PRDM6* in Subjects with PDA**

(A and B) A pedigree with a DNA segment flanking the *PRDM6* c.788G>C mutation (resulting in p.Cys263Ser) and a portion of the protein flanking Cys263 in diverse vertebrate species are shown in (A). A pedigree with a DNA segment flanking the *PRDM6* c.1385A>G mutation (resulting in p.Arg549Gln) and a portion of the protein flanking Gln462 in diverse vertebrate species are shown in (B). Individuals with PDA are indicated by black symbols, individuals without PDA are shown as unfilled symbols, and individuals with

(legend continued on next page)

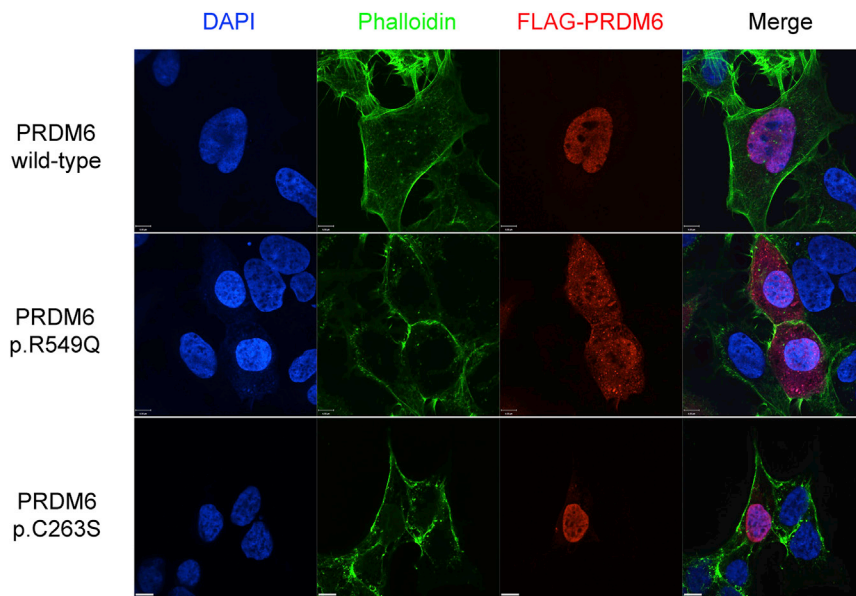

**Figure 3. The Effect of PRDM6 Amino Acid Substitutions on Its Nuclear Localization**

Immunofluorescence staining of wild-type PRDM6, PRDM6 p.Arg549Gln (p.R549Q), and p.Cys263Ser (p.C263S) in HEK293 cells. Whereas wild-type PRDM6 and p.Cys263Ser were localized in the nucleus, p.Arg549Gln was predominantly localized in the cytoplasm. Colors are as follows: blue, DAPI; green, phalloidin; and red, PRDM6 with FLAG tag. Scale bars represent 7  $\mu$ m.

highly conserved among all orthologs and paralogs (Figures 2A and 2B). Cys263 resides in the highly conserved SET domain, which is involved in chromatin regulation and determines how the enzyme catalyzes the transfer of the methyl from S-adenosyl methionine to the histone residue.<sup>17</sup> A schematic of the PRDM6 domains and the location of the three independent amino acid substitutions are shown in Figure 2C.

#### **PRDM6 c.1646G>A Impairs Nuclear Localization of the Encoded Protein**

PRDM6 is a nuclear protein that functions as a histone methyltransferase and suppresses the transcription of VSMC contractile proteins.<sup>18</sup> We overexpressed constructs encoding wild-type PRDM6 and PRDM6 variants p.Arg549Gln and p.Cys263Ser, which lie in critical domains in HEK293 cells and human aortic VSMCs. Arg549 resides in a protein segment that has previously been shown to be critical for nuclear localization.<sup>18</sup> Furthermore, in silico analysis designated this amino acid as an RNA binding site. Functional in vitro characterization of PRDM6 p.Arg549Gln in HEK293 cells and human aortic VSMCs showed that the variant protein significantly loses its capability for nuclear localization (Figures 3 and 4). Co-staining with markers of the endoplasmic reticulum (calnexin), Golgi apparatus (GM130), and mitochondria (Cox IV) and the nuclear transporter importin- $\beta$  excluded retention of the protein on any of these organelles (Figure S2). We subsequently used an adenovirus vector to overexpress DNA encoding wild-type PRDM6 and PRDM6 variants p.Arg549Gln and p.Cys263Ser in

human aortic VSMCs. Immunofluorescence (IF) showed that, compared to the empty vector, wild-type PRDM6 suppressed MYH11, but PRDM6 p.Arg549Gln and p.Cys263Ser largely failed to reduce its amount (Figure 4). Given that the function of the wild-type protein is to silence the transcription of VSMCs, this finding suggests loss of function.

#### **PRDM6 Substitutions Exhibit Loss of Function in Histone Modification and Suppression of VSMC Contractile Proteins**

PRDM6 has been implicated in histone lysine methylation and transcriptional suppression of contractile protein in smooth muscle cells.<sup>18</sup> We examined the effects of the amino acid substitution on H3K9 and H4K20 dimethylation in human aortic VSMCs by using an adenovirus vector to overexpress DNA encoding wild-type PRDM6 and PRDM6 variants p.Arg549Gln and p.Cys263Ser. Wild-type PRDM6 reduced dimethylation of H3K9 and increased dimethylation of H4K20, whereas both variant PRDM6 proteins had completely opposite effects (Figure 5A).

Immunoblot analysis revealed that PRDM6 p.Arg549Gln and p.Cys263Ser were associated with higher amounts of MYH11 and  $\alpha$ -SMA than was the wild-type (Figure 5B). Because PRDM6 amino acid substitutions might cause a dominant-negative effect by altering dimerization, we assessed this property of wild-type and variant PRDM6 in vitro by using native PAGE gel (Figure S4). No change in dimerization was identified between wild-type and variant PRDM6. These findings provide strong evidence supporting the functional effects of the amino acid substitutions and provide strong links to disease pathogenesis.

Interestingly, we also observed an increased burden of mutations in other histone-modifying genes in the remaining PDA subjects. A GSEA (see Material and Methods)

unknown PDA status are shown with partially filled squares. Circles represent females, squares represent males, and symbols with a slash through them indicate deceased subjects.

(C) A schematic of PRDM6 with functional domains and the location of the three independent mutations are shown. Intronic regions are not drawn to scale. ZF denotes zinc finger.

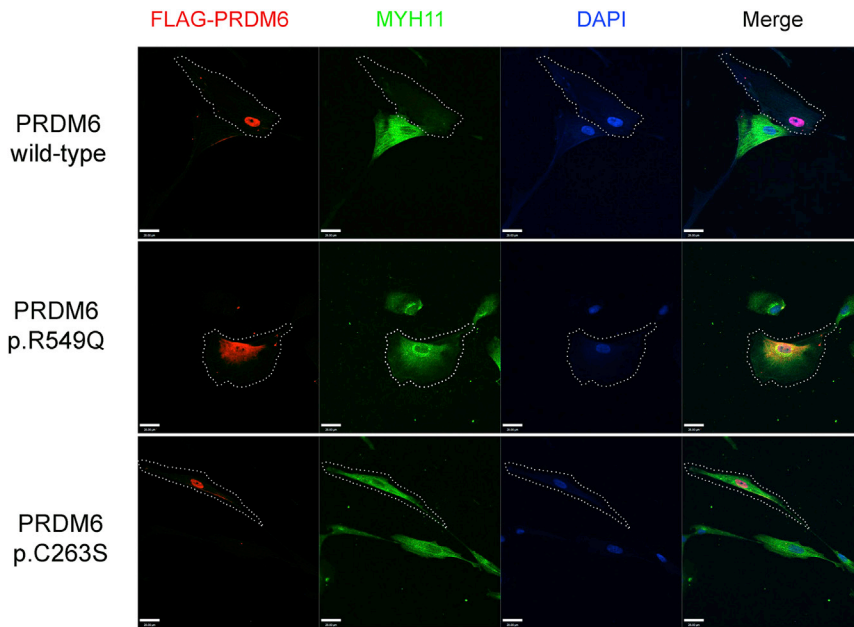

**Figure 4. The Effect of PRDM6 Amino Acid Substitutions on MYH11 Cellular Levels**

Immunostaining demonstrates the localization of PRDM6 (red) in relationship to the nucleus (blue) and the staining for MYH11 in human aortic smooth muscle cells. Cells infected with wild-type PRDM6, PRDM6 p.Arg549Gln (p.R549Q), and PRDM6 p.Cys263Ser (p.C263S) are shown in the top, middle, and bottom rows, respectively. Wild-type PRDM6 suppressed MYH11. Substitution p.Arg549Gln was largely retained in the cytoplasm, whereas p.Cys263Ser was mainly expressed in the nucleus. In smooth muscle cells overexpressing DNA encoding p.Arg549Gln and p.Cys263Ser, MYH11 staining was comparable to that in non-transfected cells. Dotted lines delineate transfected cells. Scale bars represent 28  $\mu\text{m}$ .

revealed that previously unreported deleterious mutations in histone-modification pathways (Tables S2 and S3) were significantly associated with PDA in 15 of 32 affected individuals (estimated odds ratio = 14.95, CI = 8.63–25.50). Although GSEA does not establish causality, the finding is intriguing and relevant given a priori association between the histone modifier PRDM6 and PDA.

#### Evaluation of PRDM6 Amounts in DA Smooth Muscle Cells

The pressing question is how reduced function of PRDM6 causes disease even though it results in higher amounts of contractile proteins. We examined the amounts of PRDM6 in wild-type DA and aorta in different stages of develop-

ment by IF. Examination of mouse DA in E14.5, E17.5, and P0.5 embryos (Figure 6A) showed dynamic changes in staining of PRDM6 in DA smooth muscle cells—staining was strong prenatally but declined rapidly postnatally (Figure 6B)—whereas the aorta showed no significant change in PRDM6 staining before or after birth (Figure 6C). This reduction in the amount of ductus PRDM6 was not due to increased apoptosis (Figure S5). Despite a previous report, there was no detectable staining of PRDM6 in CD31<sup>+</sup> (endothelial) cells. Taken together, these findings suggest that PRDM6 maintains VSMCs in an undifferentiated state during embryonic life, a function most likely required for their proliferation. The rapid postnatal decline of PRDM6 amounts can also be explained for the necessary

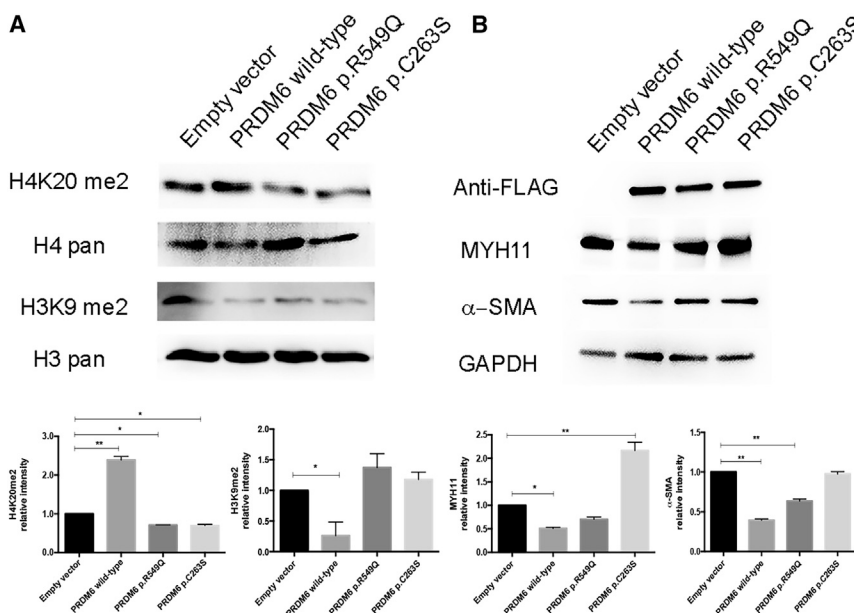

**Figure 5. The Effect of PRDM6 Amino Acid Substitutions on the Amounts of H4K20me2, H3K9me2, MYH11, and  $\alpha$ -SMA**

Immunoblot shows the amounts of histones H4K20me2 and H3K9me2 (A) and MYH11 and  $\alpha$ -SMA (B) in wild-type human aortic VSMCs transfected with wild-type PRDM6, PRDM6 p.Arg549Gln (p.R549Q), and PRDM6 p.Cys263Ser (p.C263S). Cells transfected with empty vector were used as controls. The lower panel shows the relative intensities by densitometry. Error bars denote the SEM.

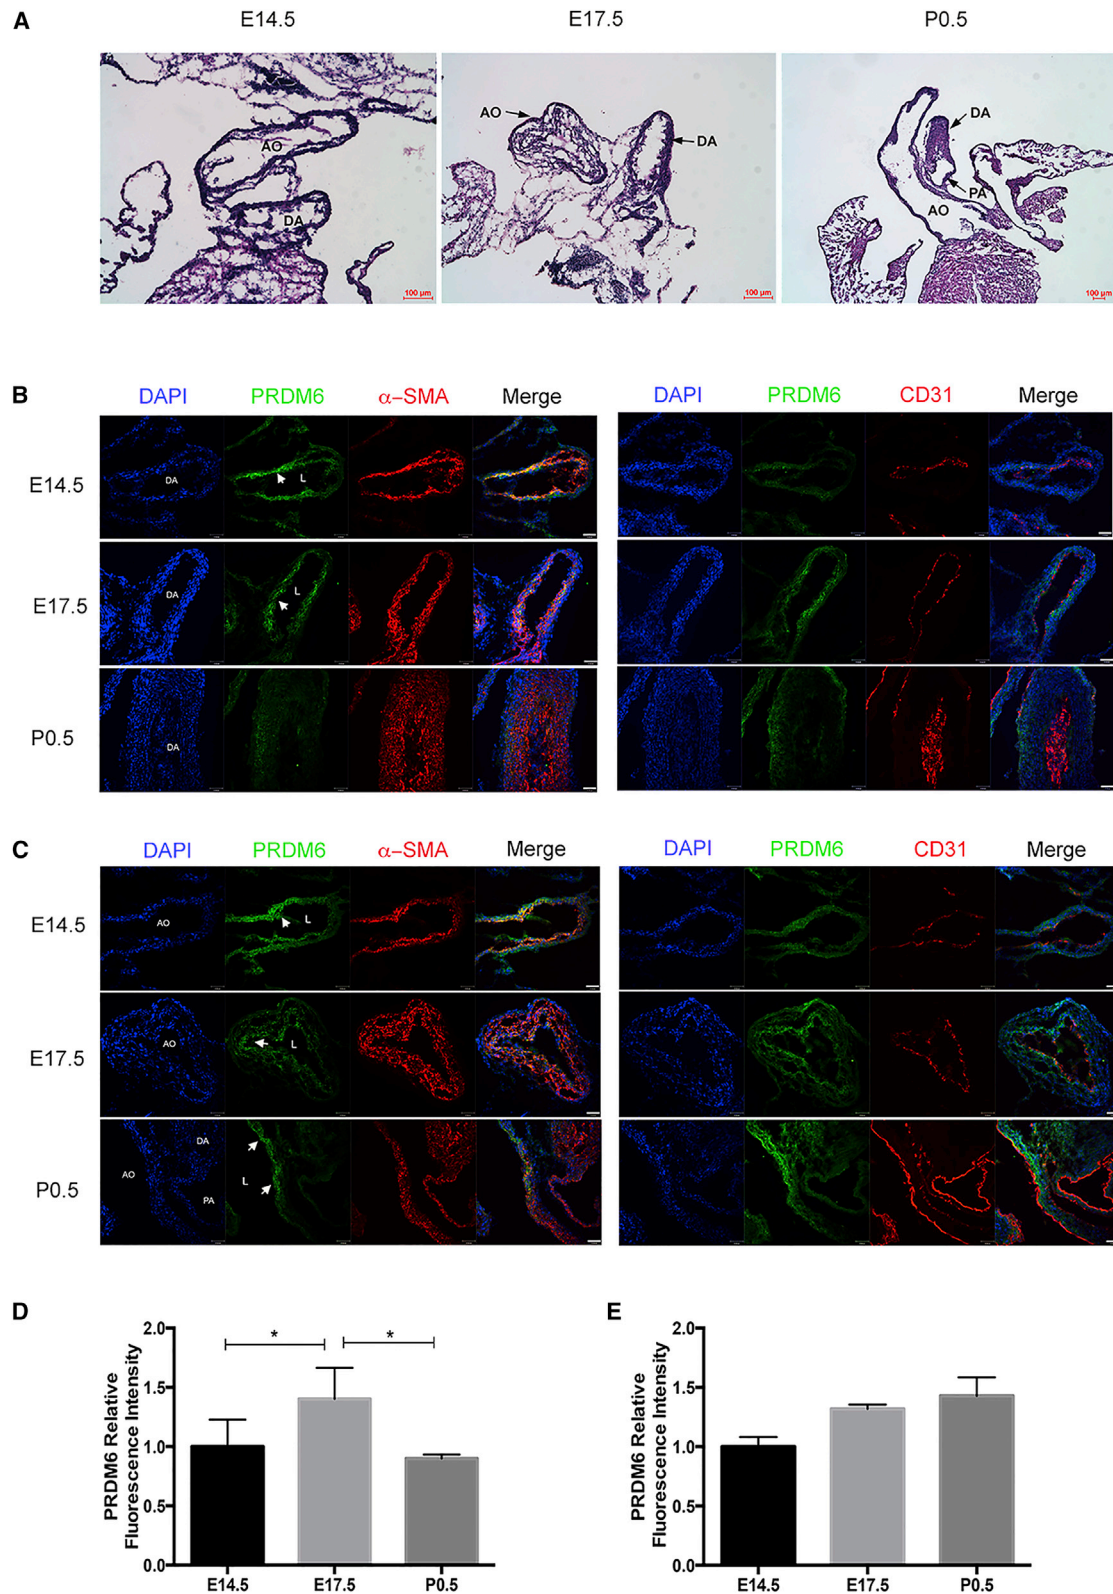

**Figure 6. Dynamic Changes in PRDM6 Abundance in Mouse DA and Great Vessels**

(A) H&E staining of the aorta (AO), ductus arteriosus (DA), and pulmonary artery (PA) at E14.5, E17.5, and P0.5.

(B and C) IF staining of PRDM6,  $\alpha$ -SMA, and CD31 at E14.5, E17.5, and P0.5. (B) PRDM6 was detectable in smooth muscle cells, but not in endothelia cells, of the DA at E14.5 and E17.5. Its amounts were diminished in the DA at P0.5. (C) PRDM6 was persistently detected in smooth muscle cells of the aorta at all three embryonic stages without significant variation. Scale bars represent 37  $\mu$ m.

(D and E) Relative intensities of PRDM6 in the DA (D) and aorta (E) at E14.5, E17.5, and P0.5 in seven mice. L denotes lumen. Arrowheads point toward PRDM6 staining. Error bars denote the SEM.



VSMC differentiation enabling these cells to contract and occlude DA lumen. *PRDM6* loss of function in humans and mice causes premature differentiation and reduced proliferation of VSMCs, resulting in impaired cushion formation and patency of the vessel. In conclusion, our study has identified *PRDM6* mutations as the underlying causes of inherited nonsyndromic PDA and implies impaired epigenetic regulation in the pathogenesis of PDA.

## Discussion

CHDs are the most common developmental defects in newborns and children. Although their heritability is well established, identification of their causal mutations has been limited by their complex pattern of inheritance. PDA is one of the most common inherited CHDs and is also seen as a result of environmental insults such as maternal rubella infection. It is caused by impaired embryonic remodeling of the DA, a process that has been of great interest because of its resemblance to pathological remodeling of adult vessels. As a result, extensive studies have been carried out to elucidate the underlying mechanism of DA remodeling, both in vivo and in vitro. Despite these efforts, the pathophysiology of the nonsyndromic PDA in humans has remained obscure. By using linkage analysis and WES, we identified independent mutations in *PRDM6* as the underlying causes of isolated nonsyndromic autosomal-dominant PDA.

The functional significance of the encoded amino acid substitutions was established by the high conservation of the mutated bases, in vitro functional studies, and tissue-specific and dynamic changes of *PRDM6* amounts in the murine embryonic DA. Arg549 is a highly conserved amino acid that resides in a protein region that has been previously shown to play a critical role in the protein's nuclear localization.<sup>18</sup> It is also predicted to be a RNA binding site by in silico analysis. Accordingly, in vitro analysis showed that the p.Arg549Gln substitution impairs the nuclear localization of the protein and acts as a loss-of-function variant. Cys263, which is substituted by serine, is a highly conserved amino acid that resides in the SET domain, functionally critical for its methyl transferase activities. Glu462, which is substituted by arginine, is also a highly conserved amino acid and is predicted to be damaging by SIFT and PolyPhen.

*PRDM6* is a member of the *PRDM* family of transcriptional repressors, which contain a PR domain and multiple zinc-finger domains. It is abundantly present in the cardiac outflow tract and the DA and is involved in epigenetic regulation of VSMC contractile proteins.<sup>18</sup> Interestingly, several PDA-affected individuals showed evidence of enrichment of previously unreported non-conservative amino acid substitutions in other histone modifiers (Tables S2 and S3). Compared to *PRDM6* mutations, these variants most likely impart much smaller effects on the trait given that they occur mainly sporadically and occasionally

more than once in each individual. Overall, our findings prompt the question as to whether inherited or acquired forms of PDA are caused by epigenetic dysregulation of vascular genes.

*PRDM6* functions as a transcriptional repressor of myocardin, GATA-6, smooth muscle cell actins, and myosins.<sup>18</sup> These proteins are important for VSMC differentiation and their development of contractile phenotypes.<sup>19</sup> Thus, with the finding of *PRDM6* mutations, we hypothesized that *PRDM6* loss of function results in early differentiation of VSMCs and thus their reduced proliferation. A rapid decline of *PRDM6* in the wild-type DA suggests that VSMC differentiation occurs in later developmental stages to promote the contraction and sufficient *PRDM6* amounts necessary for proliferation of these cells. Accordingly, altered function of *Tfap2b*—the murine ortholog of *TFAP2B* (MIM: 601601), the gene associated with human syndromic PDA, known as Char syndrome (MIM: 169100)—also results in impaired development of the VSMC layer and patency of the DA in mice.<sup>20</sup> PDA has been reported in a few subjects with thoracic aortic aneurysm and rare genetic variants in *MYH11* (MIM: 132900) and *ACTA2* (MIM: 611788).<sup>21,22</sup> Structural analyses of the aorta in these affected individuals have revealed large areas of medial degeneration with very low VSMC content. In this study, we found no coding variants in *MYH11*, *ACTA2*, or *JAG1* (MIM: 187500). To our knowledge, none of these genes have been associated with isolated PDA.

In summary, our study establishes the key role of *PRDM6* in regulation of VSMC plasticity during DA remodeling. In vitro functional characterization of *PRDM6* and its impaired function and the identification of its epigenetic targets are important steps toward discovering novel pathways for the development of drugs against diverse vascular disorders.

## Supplemental Data

Supplemental Data include a Supplemental Note, five figures, and three tables and can be found with this article online at <http://dx.doi.org/10.1016/j.ajhg.2016.03.022>.

## Acknowledgments

This work was supported by NIH grants (1R01HL122830 and 1R01HL122822) to A.M. and the NIH Centers for Mendelian Genomics (5U54HG006504). We would like to thank Dr. Kathleen Martin from Yale University for providing us with human aortic vascular smooth muscle cells. We also thank Dr. Sekar Kathiresan at Massachusetts General Hospital for providing us with access to his whole-exome sequencing database. The authors would like to thank the National Heart, Lung, and Blood Institute Grand Opportunity (GO) Exome Sequencing Project and its ongoing studies, which produced and provided exome variant calls for comparison: the Lung GO Sequencing Project (HL-102923), the Women's Health Initiative Sequencing Project (HL-102924), the Broad GO Sequencing Project (HL-102925), the Seattle GO Sequencing Project (HL-102926), and the Heart GO Sequencing Project

(HL-103010). The authors would like to thank the Exome Aggregation Consortium and the groups that provided exome variant data for comparison. A full list of contributing groups can be found at <http://exac.broadinstitute.org/about>.

Received: October 13, 2015

Accepted: March 21, 2016

Published: May 12, 2016

## Web Resources

ExAC Browser, <http://exac.broadinstitute.org>

Gene Ontology, <http://geneontology.org/page/go-enrichment-analysis>

NHLBI Exome Sequencing Project (ESP) Exome Variant Server, <http://evs.gs.washington.edu/EVS/>

OMIM, <http://www.omim.org>

PolyPhen-2, <http://genetics.bwh.harvard.edu/pph2/>

RefSeq, <http://www.ncbi.nlm.nih.gov/refseq/>

SIFT, <http://sift.jcvi.org>

UCSC Genome Browser, <https://genome.ucsc.edu/>

## References

- Hoffman, J.L., and Kaplan, S. (2002). The incidence of congenital heart disease. *J. Am. Coll. Cardiol.* *39*, 1890–1900.
- Mani, A., Meraji, S.M., Houshyar, R., Radhakrishnan, J., Mani, A., Ahangar, M., Rezaie, T.M., Taghavinejad, M.A., Broumand, B., Zhao, H., et al. (2002). Finding genetic contributions to sporadic disease: a recessive locus at 12q24 commonly contributes to patent ductus arteriosus. *Proc. Natl. Acad. Sci. USA* *99*, 15054–15059.
- Coceani, F., Armstrong, C., and Kelsey, L. (1989). Endothelin is a potent constrictor of the lamb ductus arteriosus. *Can. J. Physiol. Pharmacol.* *67*, 902–904.
- Coceani, F. (1994). Control of the ductus arteriosus—a new function for cytochrome P450, endothelin and nitric oxide. *Biochem. Pharmacol.* *48*, 1315–1318.
- Muti, R. (1970). [Morphology and structure of the ductus arteriosus (Botallo's) and genesis of the ligamentum arteriosum in man]. *Biol. Lat.* *22*, 25–40.
- Garcia, O.S. (1975). [Functional architecture of the ligamentum arteriosum in adults]. *Acta Anat. (Basel)* *91*, 313–320.
- Gersony, W.M. (1977). Commentary: patent ductus arteriosus and the respiratory distress syndrome—a perspective. *J. Pediatr.* *91*, 624–625.
- Toizumi, M., Motomura, H., Vo, H.M., Takahashi, K., Pham, E., Nguyen, H.A., Le, T.H., Hashizume, M., Ariyoshi, K., Dang, D.A., et al. (2014). Mortality associated with pulmonary hypertension in congenital rubella syndrome. *Pediatrics* *134*, e519–e526.
- Satoda, M., Zhao, F., Diaz, G.A., Burn, J., Goodship, J., Davidson, H.R., Pierpont, M.E., and Gelb, B.D. (2000). Mutations in TFAP2B cause Char syndrome, a familial form of patent ductus arteriosus. *Nat. Genet.* *25*, 42–46.
- Mani, A., Radhakrishnan, J., Farhi, A., Carew, K.S., Warnes, C.A., Nelson-Williams, C., Day, R.W., Pober, B., State, M.W., and Lifton, R.P. (2005). Syndromic patent ductus arteriosus: evidence for haploinsufficient TFAP2B mutations and identification of a linked sleep disorder. *Proc. Natl. Acad. Sci. USA* *102*, 2975–2979.
- Keramati, A.R., Fathzadeh, M., Go, G.W., Singh, R., Choi, M., Faramarzi, S., Mane, S., Kasaei, M., Sarajzadeh-Fard, K., Hwa, J., et al. (2014). A form of the metabolic syndrome associated with mutations in DYRK1B. *N. Engl. J. Med.* *370*, 1909–1919.
- Wang, S., Song, K., Srivastava, R., Dong, C., Go, G.W., Li, N., Iwakiri, Y., and Mani, A. (2015). Nonalcoholic fatty liver disease induced by noncanonical Wnt and its rescue by Wnt3a. *FASEB J.* *29*, 3436–3445.
- Subramanian, A., Tamayo, P., Mootha, V.K., Mukherjee, S., Ebert, B.L., Gillette, M.A., Paulovich, A., Pomeroy, S.L., Golub, T.R., Lander, E.S., and Mesirov, J.P. (2005). Gene set enrichment analysis: a knowledge-based approach for interpreting genome-wide expression profiles. *Proc. Natl. Acad. Sci. USA* *102*, 15545–15550.
- Mootha, V.K., Lindgren, C.M., Eriksson, K.F., Subramanian, A., Sihag, S., Lehar, J., Puigserver, P., Carlsson, E., Ridderstråle, M., Laurila, E., et al. (2003). PGC-1 $\alpha$ -responsive genes involved in oxidative phosphorylation are coordinately downregulated in human diabetes. *Nat. Genet.* *34*, 267–273.
- Zaidi, S., Choi, M., Wakimoto, H., Ma, L., Jiang, J., Overton, J.D., Romano-Adesman, A., Bjornson, R.D., Breitbart, R.E., Brown, K.K., et al. (2013). De novo mutations in histone-modifying genes in congenital heart disease. *Nature* *498*, 220–223.
- Lynch, H.T., Grissom, R.L., Magnuson, C.R., and Krush, A. (1965). Patent ductus arteriosus. Study of two families. *JAMA* *194*, 135–138.
- Rice, J.C., Briggs, S.D., Ueberheide, B., Barber, C.M., Shabanowitz, J., Hunt, D.F., Shinkai, Y., and Allis, C.D. (2003). Histone methyltransferases direct different degrees of methylation to define distinct chromatin domains. *Mol. Cell* *12*, 1591–1598.
- Davis, C.A., Haberland, M., Arnold, M.A., Sutherland, L.B., McDonald, O.G., Richardson, J.A., Childs, G., Harris, S., Owens, G.K., and Olson, E.N. (2006). PRISM/PRDM6, a transcriptional repressor that promotes the proliferative gene program in smooth muscle cells. *Mol. Cell. Biol.* *26*, 2626–2636.
- Huang, J., Cheng, L., Li, J., Chen, M., Zhou, D., Lu, M.M., Proweller, A., Epstein, J.A., and Parmacek, M.S. (2008). Myocardin regulates expression of contractile genes in smooth muscle cells and is required for closure of the ductus arteriosus in mice. *J. Clin. Invest.* *118*, 515–525.
- Zhao, F., Bosserhoff, A.K., Buettner, R., and Moser, M. (2011). A heart-hand syndrome gene: Tfp2b plays a critical role in the development and remodeling of mouse ductus arteriosus and limb patterning. *PLoS ONE* *6*, e22908.
- Guo, D.C., Pannu, H., Tran-Fadulu, V., Papke, C.L., Yu, R.K., Avidan, N., Bourgeois, S., Estrera, A.L., Safi, H.J., Sparks, E., et al. (2007). Mutations in smooth muscle alpha-actin (ACTA2) lead to thoracic aortic aneurysms and dissections. *Nat. Genet.* *39*, 1488–1493.
- Zhu, L., Vranckx, R., Khau Van Kien, P., Lalande, A., Boisset, N., Mathieu, F., Wegman, M., Glancy, L., Gasc, J.M., Brunotte, F., et al. (2006). Mutations in myosin heavy chain 11 cause a syndrome associating thoracic aortic aneurysm/aortic dissection and patent ductus arteriosus. *Nat. Genet.* *38*, 343–349.

## Supplemental Data

### Mutations in the Histone Modifier

#### *PRDM6* Are Associated with Isolated

#### Nonsyndromic Patent Ductus Arteriosus

Na Li, Lakshman Subrahmanyam, Emily Smith, Xiaoqing Yu, Samir Zaidi, Murim Choi, Shrikant Mane, Carol Nelson-Williams, Mohadesseh Bahjati, Mohammad Kazemi, Mohammad Hashemi, Mohsen Fathzadeh, Anand Narayanan, Likun Tian, Farhad Montazeri, Mitra Mani, Michael L. Begleiter, Brian G. Coon, Henry T. Lynch, Eric N. Olson, Hongyu Zhao, Jürgen Ruland, Richard P. Lifton, and Arya Mani

### **Supplemental Note: Case Report**

The index case (III-2, fig.1A, arrow) was diagnosed with PDA at age 17 after she developed shortness of breath and peripheral edema during her first pregnancy. She delivered a healthy full-term child that was found to have a heart murmur and PDA. Further evaluation of the family at that time identified four additional family members with PDA. Individual II-2, who was known to have heart murmur, had fathered affected children by two different spouses, and 4 of his offspring were affected (fig. 1A). Two affected offspring also had children with PDA. In order to determine whether additional cases of PDA have occurred since the initial report, the kindred was reinvestigated and medical records of participating family members were reviewed. Individuals were classified as affected with PDA on the basis of cardiac catheterization or postmortem diagnosis of PDA. Eight individuals have undergone invasive procedures to close the patent ductus between the neonatal period and age 17. One neonate had died from congestive heart failure; with autopsy revealing a hypoplastic left ventricle, ventricular septum defect, mild pulmonary artery stenosis and a large and severely dilated PDA. There were no distinctive syndromic features noted in any of the affected subjects.

# Supplemental Figures

## Figure S1

### A

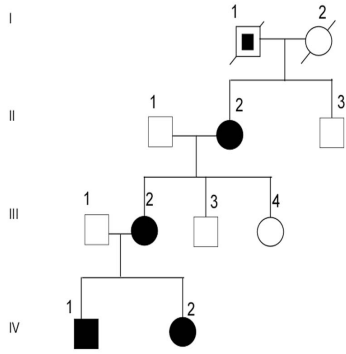

### B

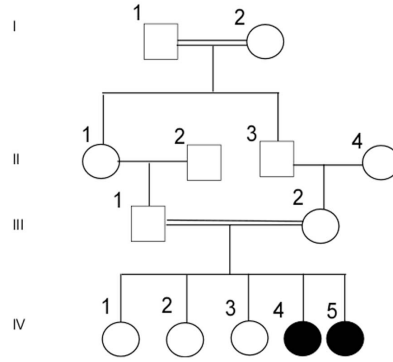

### C

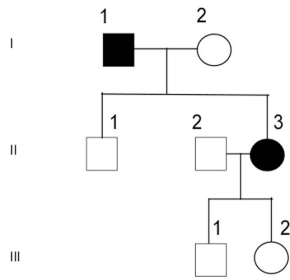

### D

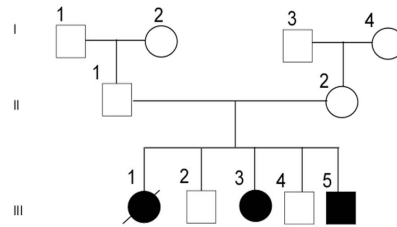

### E

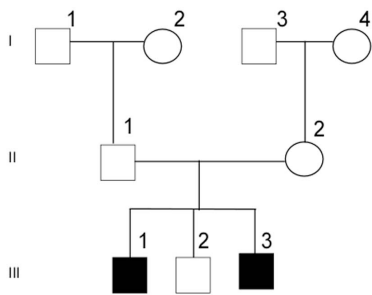

Figure S2

A)

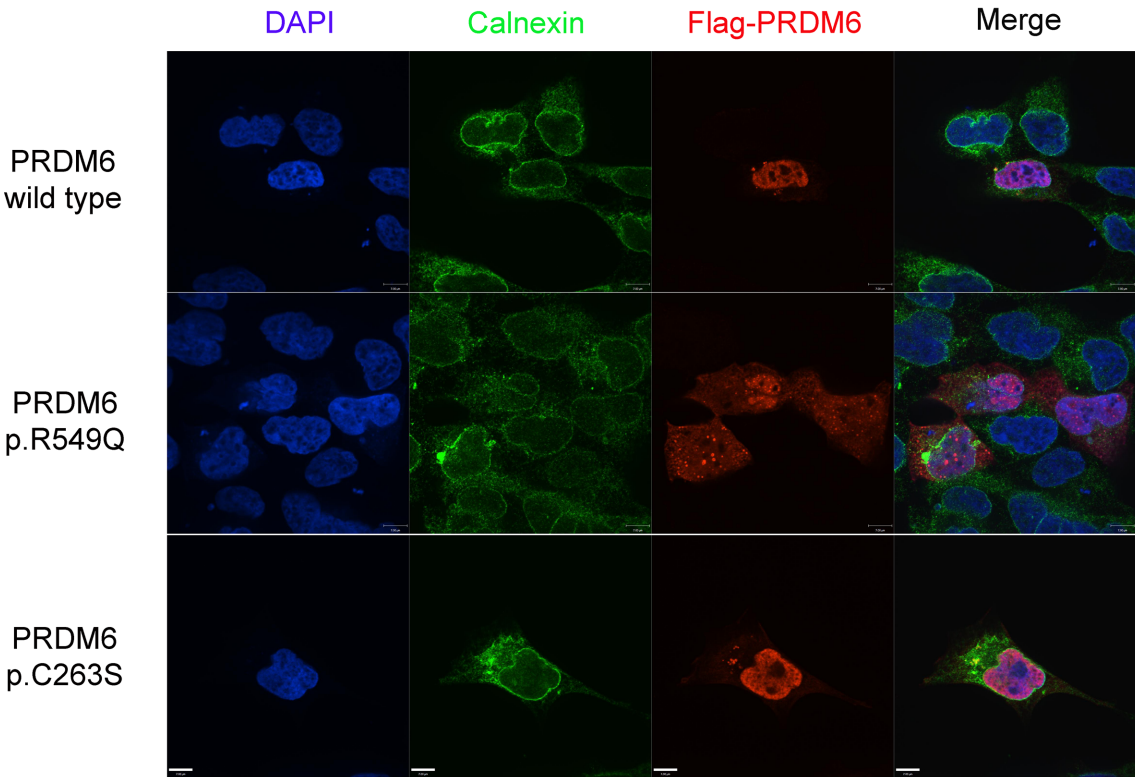

B)

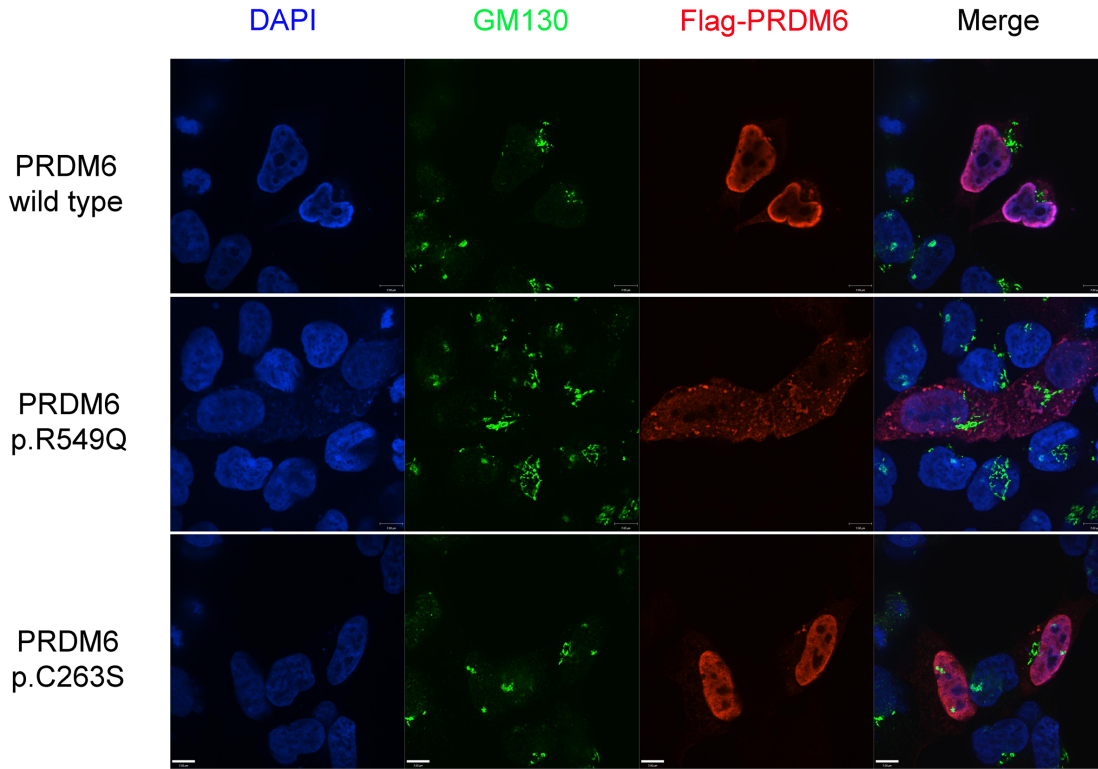

C)

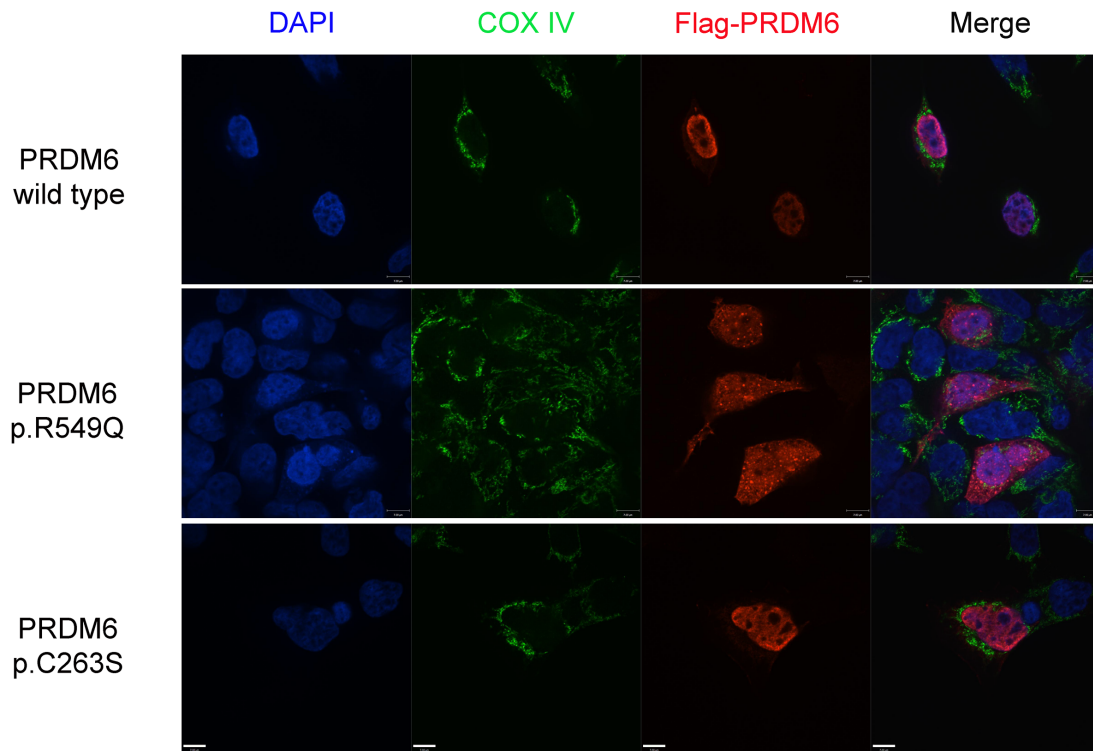

D)

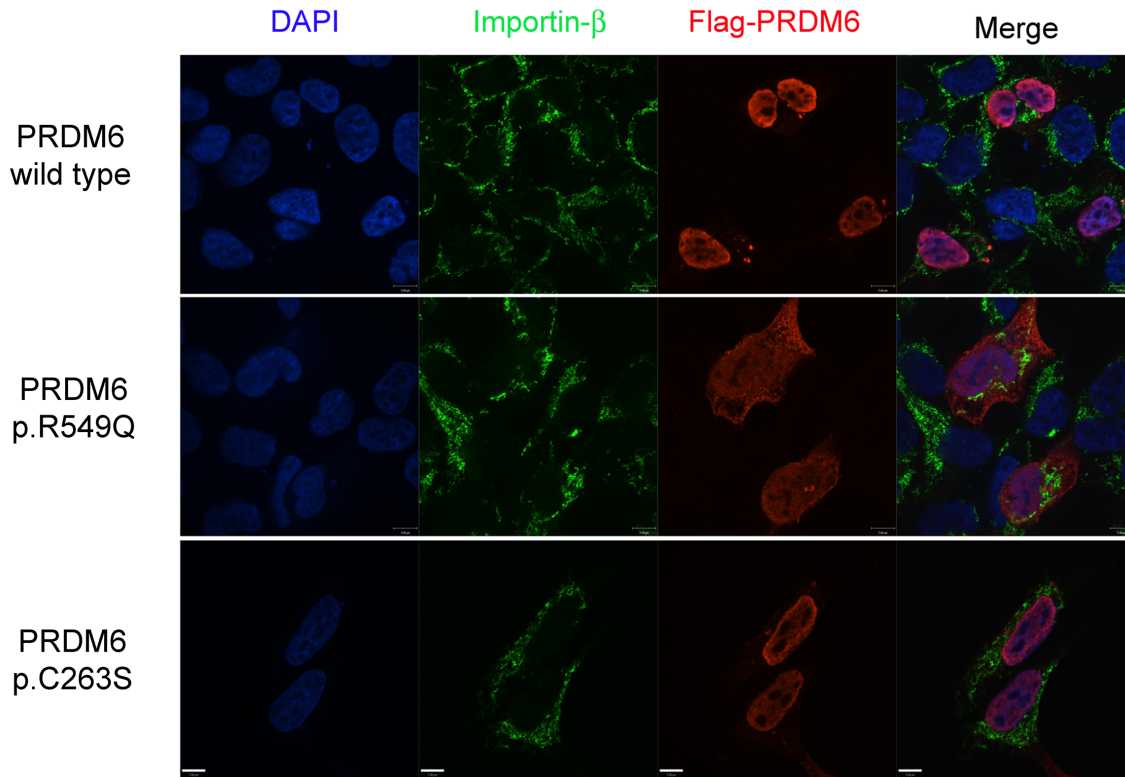





Figure S4

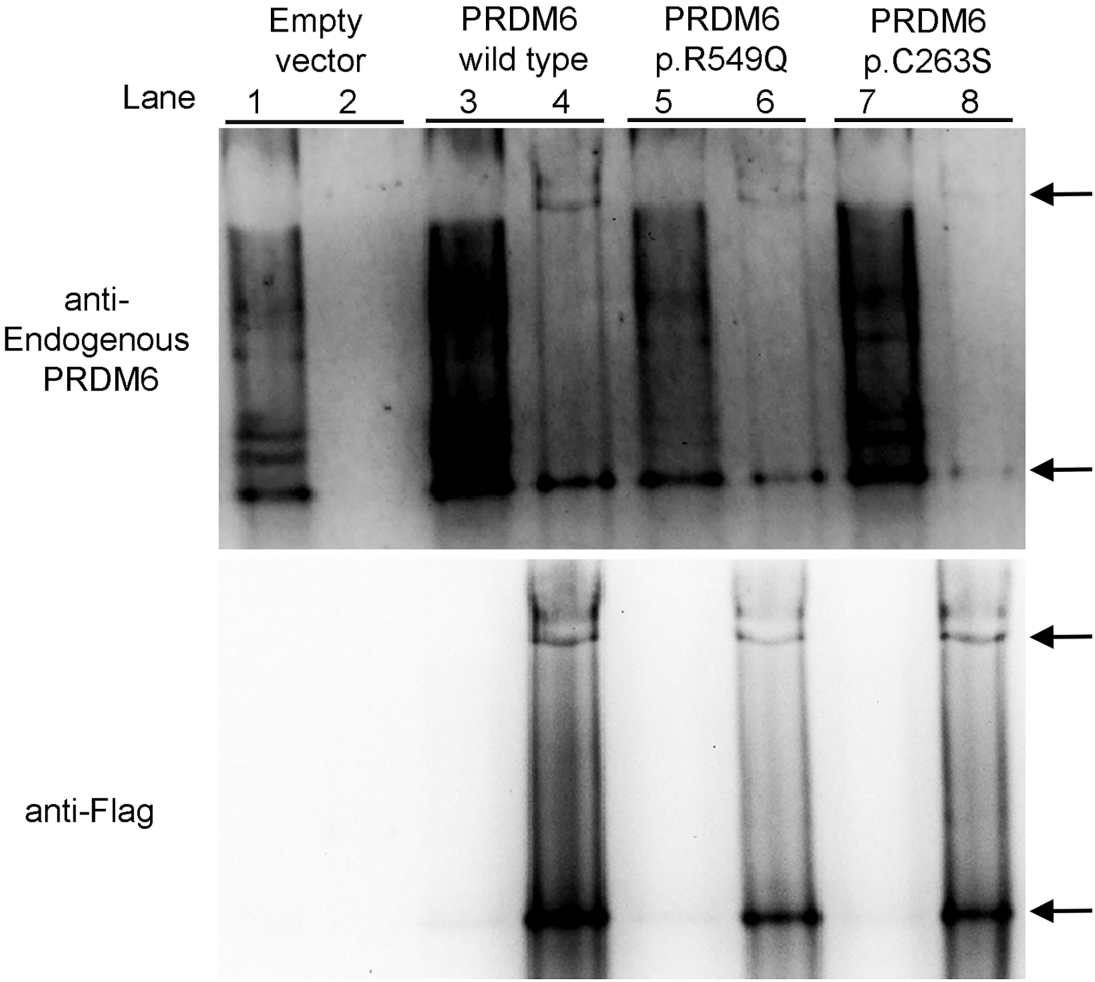

Figure S5

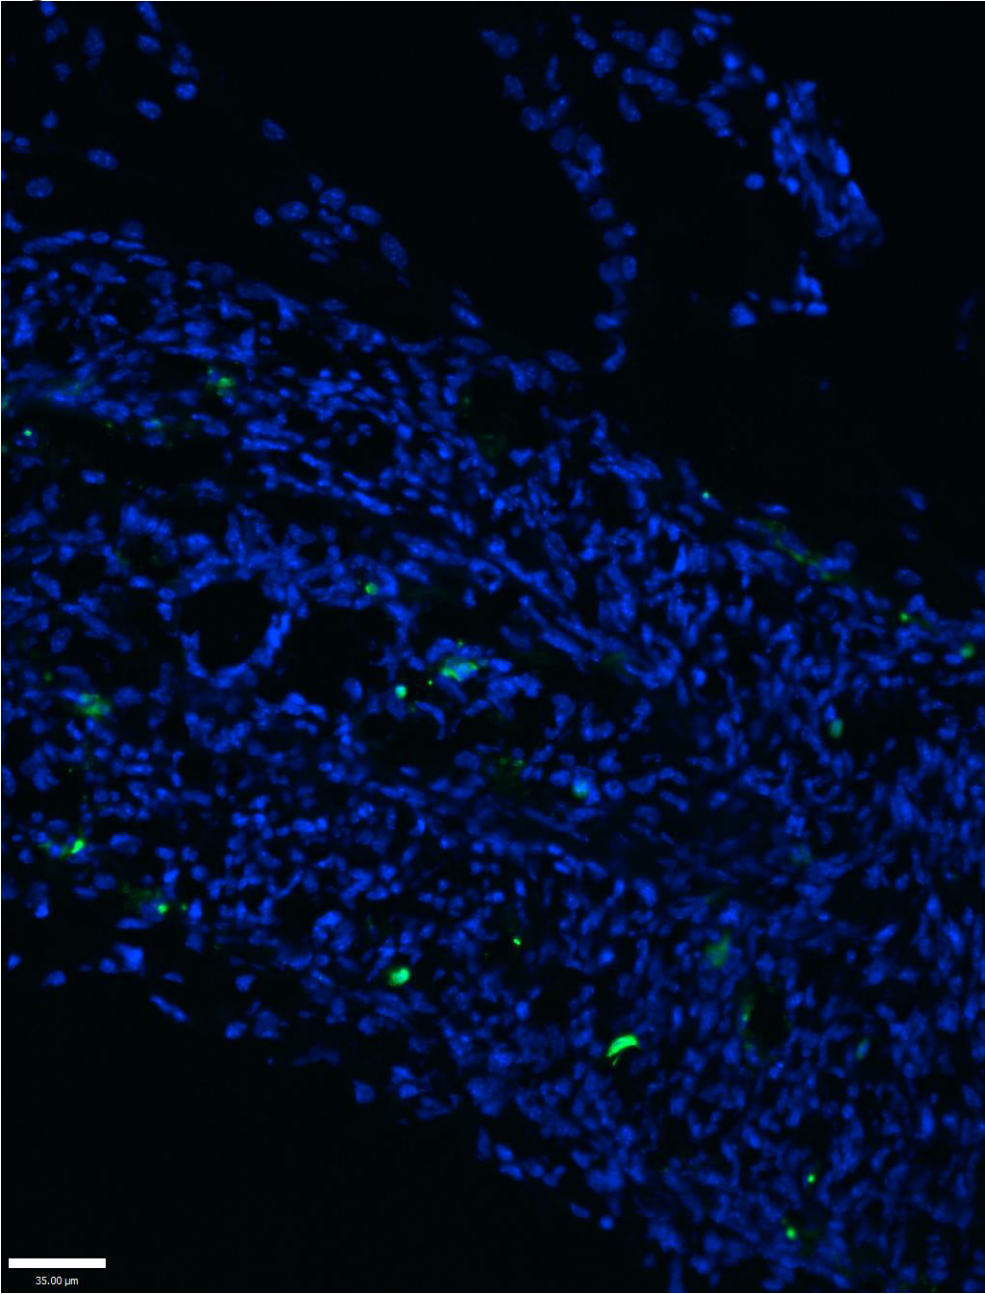

## Supplemental Figure Legends:

**Figure S1** – Representative pedigrees from other Caucasian families in our study. Individuals with PDA are indicated by black symbols; unaffected individuals are shown as unfilled symbols; individuals with unknown status have a dotted symbol. Circles represent females; squares represent males and symbols with a slash through them indicate deceased subjects.

**Figure S2** - Immuofluorescent pictures localizing wild type and two mutants *PRDM6* variants *PRDM6*<sub>Arg549Gln</sub> (p.R549Q) and *PRDM6*<sub>Cys263Ser</sub> (p.C263S) in relationship to the ER (calnexin) (A), Golgi apparatus (GM130) (B), mitochondria (COX IV) (C) and Importin-β (D) in HEK293 cells. *PRDM6*<sub>R549Q</sub> retains largely in cytoplasm but not in Golgi or the ER.

**Figure S3** – The visualization of the principle component analysis (PCA) using the EIGENSTRAT program to compare SNP genotypes with MAF >5% between probands and 2000 North European controls. SNPs without evidence for significant linkage disequilibrium were used. The analysis excluded population stratification. Changing control population to the population from 1,000 Genomes did not change the result of analysis. A separate analysis was carried out using 2000 Northern European unaffected subjects sequenced in the same facility using the same WES protocol as a second control group (data not shown). Population stratification was excluded using this analysis, supporting consistent comparison between burden of variants in cases and controls.

**Figure S4** - *PRDM6* homodimerization. Human aortic VSMC were transduced with adenovirus (empty adenoviruses vectors or vectors containing Flag-tagged mouse *PRDM6* wild type, *PRDM6*<sub>p.R549Q</sub>, and *PRDM6*<sub>p.C263S</sub> constructs) and cultured for 48hr. Cells were washed twice with phosphate-buffered saline, scraped and lysed in 10mM Tris, pH7.4, 150mM NaCl, 1mM EDTA, 1% Triton X-100, and a cocktail of protease inhibitors. The supernatant was clarified by centrifugation at 20,000 g 4°C for 20min. Subsequently, lysates were immunoprecipitated with anti-Flag resin, washed three times in lysis

buffer at 4°C and bound protein was eluted with 0.1mg/ml 3X FLAG peptide (Sigma-Aldrich, St. Louis, MO) for 1hr at 4°C with gentle rotation before subjecting to native PAGE according to manufacture's instructions (Bio-rad). Monomeric endogenous PRDM6 and dimeric complexes were detected by immunoblotting with anti-human PRDM6. Monomeric exogenous PRDM6 and dimeric complexes were then detected by immunoblotting with anti-Flag antibody. Lanes 1, 3, 5, and 7 indicate the input controls. Lanes 2, 4, 6, and 8 indicates proteins after Flag-tag purification. The arrows indicate homodimers (the upper bands) and monomers (the lower bands).

**Figure S5** - Immunofluorescence staining showing apoptotic cells (green color) in DA at stage P0.5. Blue color represents DAPI staining of the nucleus. Scale bar represents 35um. Tissue Cryosections were air dried for 1hr, and subjected to fixation in 1% PFA. Then the sections were processed using ApopTag Plus Fluorescein In Situ Apoptosis Detection Kit (EMD Millipore) according to manufacture's instructions. Briefly, cryosections were post-fixed in precooled ethanol: acetic acid (2:1) for 5 min at -20°C, and washed in PBS twice. Equilibration buffer was applied on the specimen and incubated for 10 seconds at room temperature. Then the cryosections were incubated with TdT enzyme for 1hr at 37°C and the reaction was stopped by incubating with stop/wash buffer, and incubated with anti-digoxigenin conjugate for 30 min at room temperature avoid exposure to light. Finally, the cryosections were washed in PBS four times and mounted with ProLong Gold antifade reagent with DAPI (Life technologies)

## Supplemental Tables

**Table S1: Variants within the recombination interval on 5q23**

| Position  | Gene or rs# | Mutation Type | Frequency for Exonic Variants from EXAC |
|-----------|-------------|---------------|-----------------------------------------|
| 118500981 | rs11306851  | Intronic      |                                         |
| 118639270 | rs1394631   | Intronic      |                                         |
| 120191189 | rs1422377   | Intronic      |                                         |
| 121488635 | ZNF474      | Exonic        | 0.09423                                 |
| 122091535 | rs763497    | Intronic      |                                         |
| 122287705 | rs717503    | Intronic      |                                         |
| 122915059 | rs171546    | Intronic      |                                         |
| 122920306 | rs246266    | Intronic      |                                         |
| 122515990 | PRDM6       | Exonic        | 0                                       |
| 123736339 | rs51777     | Intronic      |                                         |
| 125246089 | rs719829    | Intronic      |                                         |
| 125929031 | ALDH7A1     | Intronic      |                                         |

**Table S2: Pathways identified as significantly enriched for novel and deleterious genetic variants in 32 PDA samples**

| GO Term                              | Background Frequency | Sample Frequency | P-Value* |
|--------------------------------------|----------------------|------------------|----------|
| Biological Process                   | 15968                | 226              | 9.17E-08 |
| Cellular Process                     | 13503                | 201              | 1.68E-06 |
| Histone Modification                 | 304                  | 17               | 9.14E-04 |
| Chromatin Modification               | 307                  | 7                | 1.00E-03 |
| Histone Lysine Methylation           | 57                   | 8                | 3.10E-03 |
| Multicellular Organismal Development | 4256                 | 81               | 7.35E-03 |
| Neuron Development                   | 793                  | 24               | 1.30E-01 |
| Axon Guidance                        | 404                  | 17               | 8.40E-01 |

\* P-Values are corrected for multiple comparisons

**Table S3: Histone Modification Genes Novel and Predicted to be deleterious by Polyphen and Sift (n=32)**

| Sample ID | Gene           | Mutation | Het/Hom | Pathway                                                                                                                              | PolyPhen/SIFT score |
|-----------|----------------|----------|---------|--------------------------------------------------------------------------------------------------------------------------------------|---------------------|
| 0115      | <i>GLI3</i>    | p.A909G  | Het     | Histone acetyltransferase binding, Histone deacetylase binding                                                                       | 0.991/0             |
| 77-3      | <i>HDAC11</i>  | p.R281Q  | Het     | Histone deacetylase complex, Histone deacetylase activity, Histone deacetylation                                                     | 1/?                 |
| 100       | <i>TET3</i>    | p.K344R  | Het     | Histone H3-K4 trimethylation*                                                                                                        | 0.996/0.13          |
| 105       | <i>RBM14</i>   | p.K149R  | Het     | Histone deacetylation                                                                                                                | 0.99/0.03           |
| 115       | <i>L3MBTL1</i> | p.C101F  | Het     | Nucleosomal histone binding, Methylated histone residue binding, Histone binding*                                                    | 0.999/0.01          |
| 119       | <i>ASH1L</i>   | p.R1646K | Het     | Histone-lysine N-methyltransferase activity*                                                                                         | 0.974/0.09          |
| 120       | <i>SETD1B</i>  | p.R882H  | Het     | Histone methyltransferase complex, Histone methyltransferase activity H3-K4 specific, Histone H3-K4 methylation*                     | 1/0                 |
| 124       | <i>HJURP</i>   | p.N306K  | Het     | Histone binding                                                                                                                      | 0.985/0             |
|           | <i>L3MBTL2</i> | p.S46C   | Het     | Methylated histone residue binding, Histone binding*                                                                                 | 0.999/0.01          |
| 125       | <i>BAP1</i>    | p.C103Y  | Het     | Monoubiquitinated histone H2A deubiquination                                                                                         | 0.999/0.04          |
| 135       | <i>KMT2A</i>   | p.R4597C | Het     | Histone-lysine N-methyltransferase activity*                                                                                         | 1/0.08              |
| 138       | <i>PPAGC1A</i> | p.R282C  | Het     | Positive regulation of histone acetylation                                                                                           | 0.999/0             |
| 171       | <i>NASP</i>    | p.G407R  | Het     | Histone exchange                                                                                                                     | 1/0                 |
|           | <i>PRDM2</i>   | p.K946R  | Het     | Histone-lysine N-methyltransferase activity*                                                                                         | 1/0.01              |
| 256-3     | <i>TUT1</i>    | p.R623W  | Het     | Histone mRNA catabolic process                                                                                                       | 1/0.05              |
| 263       | <i>SP1</i>     | p.T265P  | Het     | Histone acetyltransferase binding, Histone deacetylase binding                                                                       | 0.992/0.05          |
| 327-3     | <i>TRRAP</i>   | p.N28301 | Het     | Histone acetylation, Histone deubiquination, NuA4 histone acetyltransferase complex, Histone H4 acetylation, Histone H2A acetylation | 0.993/0             |
